# Supplementary material for: A conserved cell-pole determinant organizes proper polar flagellum formation
Source: eLife journal article supplement (doi:10.7554/elife.93004), 2024-01-08
Supplement: fig3-figsupp1-data2 [file elife-93004-fig3-figsupp1-data2-v1.zip]

used for Figure 3  
supplement 1F

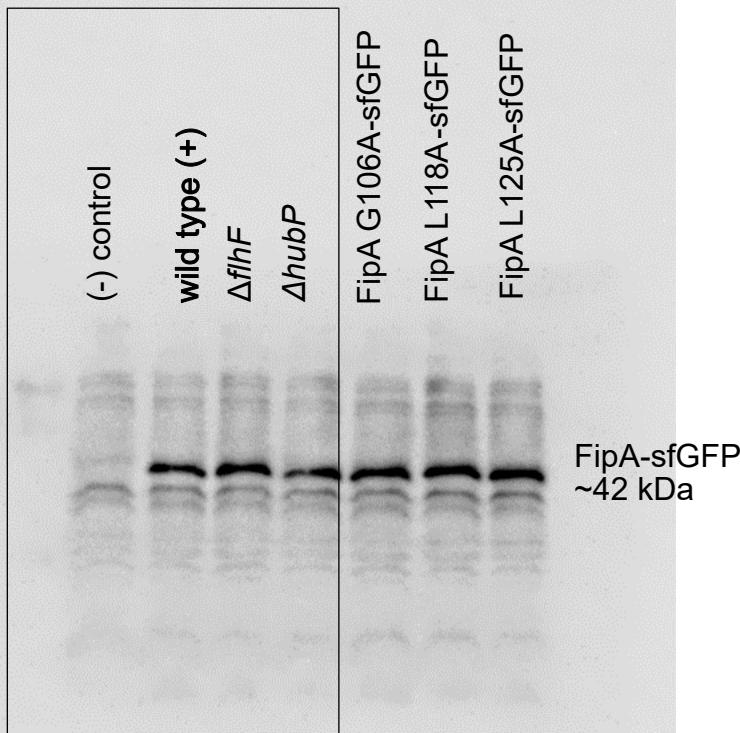

(-) control = *S. putrefaciens* wild type

(+) wild-type background & FipA-sfGFP

Date: 01.09.21
