# Supplementary material for: A conserved cell-pole determinant organizes proper polar flagellum formation
Source: eLife. 2024 Dec 5;13:RP93004. doi: 10.7554/eLife.93004 (PMC11620751; doi:10.7554/eLife.93004)
Supplement: Source data 1. [file elife-93004-data1.xlsx]

## Sheet: P. putida Flagellation (Fig 2G)
Strain	Genotype	No flagella	Polar flagellation	Subpolar flagellation
P. putida KT2440	wild type	20	80	0
P. putida KT2440	wild type	21	79	0
P. putida KT2440	wild type	24	76	0
P. putida KT2440	wild type	25	75	0
P. putida KT2440	wild type	26	74	0
P. putida KT2440	wild type	22	78	0
P. putida KT2440	wild type	19	81	0
P. putida KT2440	wild type	19	81	0
P. putida KT2440	wild type	25	75	0
P. putida KT2440	wild type	22	78	0
P. putida KT2440	wild type	21	79	0
P. putida KT2440	wild type	25	75	0
P. putida KT2440	wild type	19	81	0
P. putida KT2440	wild type	23	77	0
P. putida KT2440	wild type	24	76	0
P. putida KT2440	wild type	26	74	0
P. putida KT2440	wild type	26	74	0
P. putida KT2440	wild type	27	73	0
P. putida KT2440	wild type	17	83	0
P. putida KT2440	wild type	21	79	0
P. putida KT2440	wild type	28	72	0
P. putida KT2440	wild type	28	72	0
P. putida KT2440	wild type	22	78	0
P. putida KT2440	ΔfipA	57	39	4
P. putida KT2440	ΔfipA	61	39	0
P. putida KT2440	ΔfipA	59	37	4
P. putida KT2440	ΔfipA	68	32	0
P. putida KT2440	ΔfipA	63	37	0
P. putida KT2440	ΔfipA	61	39	0
P. putida KT2440	ΔfipA	67	33	0
P. putida KT2440	ΔfipA	64	36	0
P. putida KT2440	ΔfipA	64	36	0
P. putida KT2440	ΔfipA	70	30	0
P. putida KT2440	ΔfipA	65	35	0
P. putida KT2440	ΔfipA	64	36	0
P. putida KT2440	ΔfipA	61	39	0
P. putida KT2440	ΔfipA	68	32	0
P. putida KT2440	ΔfipA	69	31	0
P. putida KT2440	ΔfipA	63	37	0
P. putida KT2440	ΔfipA	64	36	0
P. putida KT2440	ΔfipA	65	35	0
P. putida KT2440	ΔfipA	61	39	0
P. putida KT2440	ΔfipA	61	39	0
P. putida KT2440	ΔfipA	60	40	0
P. putida KT2440	ΔfipA	64	36	0
P. putida KT2440	ΔfipA	70	30	0
P. putida KT2440	ΔflhF	92	4	4
P. putida KT2440	ΔflhF	94	3	3
P. putida KT2440	ΔflhF	94	4	2
P. putida KT2440	ΔflhF	94	1	5
P. putida KT2440	ΔflhF	93	1	6
P. putida KT2440	ΔflhF	95	0	5
P. putida KT2440	ΔflhF	95	0	5
P. putida KT2440	ΔflhF	94	0	6
P. putida KT2440	ΔflhF	91	3	6
P. putida KT2440	ΔflhF	90	5	5
P. putida KT2440	ΔflhF	93	0	7
P. putida KT2440	ΔflhF	91	3	6
P. putida KT2440	ΔflhF	89	4	7
P. putida KT2440	ΔflhF	88	6	6
P. putida KT2440	ΔflhF	86	7	7
P. putida KT2440	ΔflhF	88	6	6
P. putida KT2440	ΔflhF	94	4	2
P. putida KT2440	ΔflhF	92	3	5
P. putida KT2440	ΔflhF	100	0	0
P. putida KT2440	ΔflhF	98	2	0
P. putida KT2440	ΔflhF	92	2	6
P. putida KT2440	ΔflhF	89	2	9
P. putida KT2440	ΔflhF	87	4	9

## Sheet: S. putrefaciens Flagellation (F
Strain	Genotype	No flagella	Polar flagellation	Subpolar flagellation
S. putrefaciens CN-32	wild type	42	58	0
S. putrefaciens CN-32	wild type	45	55	0
S. putrefaciens CN-32	wild type	40	60	0
S. putrefaciens CN-32	wild type	45	55	0
S. putrefaciens CN-32	wild type	42	58	0
S. putrefaciens CN-32	wild type	46	54	0
S. putrefaciens CN-32	wild type	41	59	0
S. putrefaciens CN-32	wild type	40	60	0
S. putrefaciens CN-32	wild type	44	56	0
S. putrefaciens CN-32	wild type	46	54	0
S. putrefaciens CN-32	wild type	44	56	0
S. putrefaciens CN-32	wild type	46	54	0
S. putrefaciens CN-32	wild type	44	56	0
S. putrefaciens CN-32	wild type	44	56	0
S. putrefaciens CN-32	wild type	40	60	0
S. putrefaciens CN-32	ΔfipA	56	41	3
S. putrefaciens CN-32	ΔfipA	56	44	0
S. putrefaciens CN-32	ΔfipA	60	39	1
S. putrefaciens CN-32	ΔfipA	55	42	3
S. putrefaciens CN-32	ΔfipA	54	42	4
S. putrefaciens CN-32	ΔfipA	54	44	2
S. putrefaciens CN-32	ΔfipA	62	38	0
S. putrefaciens CN-32	ΔfipA	53	45	2
S. putrefaciens CN-32	ΔfipA	53	45	2
S. putrefaciens CN-32	ΔfipA	60	38	2
S. putrefaciens CN-32	ΔfipA	59	41	0
S. putrefaciens CN-32	ΔfipA	59	41	0
S. putrefaciens CN-32	ΔfipA	55	45	0
S. putrefaciens CN-32	ΔfipA	61	38	1
S. putrefaciens CN-32	ΔfipA	52	46	2
S. putrefaciens CN-32	ΔflhF	68	5	27
S. putrefaciens CN-32	ΔflhF	61	10	29
S. putrefaciens CN-32	ΔflhF	71	5	24
S. putrefaciens CN-32	ΔflhF	65	6	29
S. putrefaciens CN-32	ΔflhF	63	7	30
S. putrefaciens CN-32	ΔflhF	62	10	28
S. putrefaciens CN-32	ΔflhF	60	7	33
S. putrefaciens CN-32	ΔflhF	66	7	27
S. putrefaciens CN-32	ΔflhF	64	7	29
S. putrefaciens CN-32	ΔflhF	63	6	31
S. putrefaciens CN-32	ΔflhF	71	4	25
S. putrefaciens CN-32	ΔflhF	68	5	27
S. putrefaciens CN-32	ΔflhF	70	6	24
S. putrefaciens CN-32	ΔflhF	65	4	31
S. putrefaciens CN-32	ΔflhF	64	9	27

## Sheet: V. parahaemolyticus Flagellatio
Cell counts for flagellation pattern
Strain	Genotype	No flagella	Polar flagellation
V. parahaemolyticus RIMD 2210633	wild type	40	60
V. parahaemolyticus RIMD 2210633	wild type	55	45
V. parahaemolyticus RIMD 2210633	wild type	60	40
V. parahaemolyticus RIMD 2210633	ΔflhF	65	0
V. parahaemolyticus RIMD 2210633	ΔflhF	70	0
V. parahaemolyticus RIMD 2210633	ΔflhF	75	0
V. parahaemolyticus RIMD 2210633	ΔfipA	70	0
V. parahaemolyticus RIMD 2210633	ΔfipA	70	0
V. parahaemolyticus RIMD 2210633	ΔfipA	60	0
V. parahaemolyticus RIMD 2210633	fipA ΔTM	60	0
V. parahaemolyticus RIMD 2210633	fipA ΔTM	70	0
V. parahaemolyticus RIMD 2210633	fipA ΔTM	70	0

## Sheet: Fig. 2 Source Data 2
Swimming assay,,
Strain,Genotype,Swimming halo
P. putida KT2440,WT,100
P. putida KT2440,Î”fipA,58
P. putida KT2440,Î”flhF,20
P. putida KT2440,WT,100
P. putida KT2440,Î”fipA,48
P. putida KT2440,Î”flhF,14
P. putida KT2440,WT,100
P. putida KT2440,Î”fipA,59
P. putida KT2440,Î”flhF,17
V. parahaemolyticus RIMD 2210633,WT,100
V. parahaemolyticus RIMD 2210633,Î”cheW,26.8292682926829
V. parahaemolyticus RIMD 2210633,Î”flhF,14.6341463414634
V. parahaemolyticus RIMD 2210633,Î”fipA,21.9512195121951
V. parahaemolyticus RIMD 2210633,WT,100
V. parahaemolyticus RIMD 2210633,Î”cheW,26.1904761904762
V. parahaemolyticus RIMD 2210633,Î”flhF,19.047619047619
V. parahaemolyticus RIMD 2210633,Î”fipA,21.4285714285714
V. parahaemolyticus RIMD 2210633,WT,100
V. parahaemolyticus RIMD 2210633,Î”cheW,36.3636363636364
V. parahaemolyticus RIMD 2210633,Î”flhF,24.2424242424242
V. parahaemolyticus RIMD 2210633,Î”fipA,21.2121212121212
V. parahaemolyticus RIMD 2210633,WT,100
V. parahaemolyticus RIMD 2210633,Î”cheW,41.3793103448276
V. parahaemolyticus RIMD 2210633,Î”flhF,27.5862068965517
V. parahaemolyticus RIMD 2210633,Î”fipA,27.5862068965517
V. parahaemolyticus RIMD 2210633,WT,100
V. parahaemolyticus RIMD 2210633,Î”cheW,34.375
V. parahaemolyticus RIMD 2210633,Î”flhF,25
V. parahaemolyticus RIMD 2210633,Î”fipA,28.125
V. parahaemolyticus RIMD 2210633,WT,100
V. parahaemolyticus RIMD 2210633,Î”cheW,16.2790697674419
V. parahaemolyticus RIMD 2210633,Î”flhF,20.9302325581395
V. parahaemolyticus RIMD 2210633,Î”fipA,25.5813953488372
S. putrefaciens CN-32,WT,100
S. putrefaciens CN-32,Î”fipA,94
S. putrefaciens CN-32,fipA Î”TM,95.57143
S. putrefaciens CN-32,Î”flhF,44
S. putrefaciens CN-32,WT,100
S. putrefaciens CN-32,Î”fipA,95
S. putrefaciens CN-32,fipA Î”TM,88.69789
S. putrefaciens CN-32,Î”flhF,44
S. putrefaciens CN-32,WT,100
S. putrefaciens CN-32,Î”fipA,91
S. putrefaciens CN-32,fipA Î”TM,87.20353
S. putrefaciens CN-32,Î”flhF,42

## Sheet: Fig. 3 Source Data 1
FlhF Localization pattern,,,,
Strain,Percentage,Pattern,Date,Species
WT,16.3,diffuse,190315,V. parahaemolyticus
del FipA,68.9,diffuse,190315,V. parahaemolyticus
del FipA del HubP,99.5,diffuse,190315,V. parahaemolyticus
del HubP,41.9,diffuse,190315,V. parahaemolyticus
WT,57.6,unipolar,190315,V. parahaemolyticus
del FipA,21.4,unipolar,190315,V. parahaemolyticus
del FipA del HubP,0,unipolar,190315,V. parahaemolyticus
del HubP,54.3,unipolar,190315,V. parahaemolyticus
WT,26.2,bipolar,190315,V. parahaemolyticus
del FipA,9.7,bipolar,190315,V. parahaemolyticus
del FipA del HubP,0.5,bipolar,190315,V. parahaemolyticus
del HubP,3.8,bipolar,190315,V. parahaemolyticus
WT,16.6,diffuse,190312,V. parahaemolyticus
del FipA,74.3,diffuse,190312,V. parahaemolyticus
del FipA del HubP,100,diffuse,190312,V. parahaemolyticus
del HubP,61.8,diffuse,190312,V. parahaemolyticus
WT,39.6,unipolar,190312,V. parahaemolyticus
del FipA,16.7,unipolar,190312,V. parahaemolyticus
del FipA del HubP,0,unipolar,190312,V. parahaemolyticus
del HubP,33.6,unipolar,190312,V. parahaemolyticus
WT,43.8,bipolar,190312,V. parahaemolyticus
del FipA,9,bipolar,190312,V. parahaemolyticus
del FipA del HubP,0,bipolar,190312,V. parahaemolyticus
del HubP,4.6,bipolar,190312,V. parahaemolyticus
WT,38.6,diffuse,190314,V. parahaemolyticus
del FipA,66.5,diffuse,190314,V. parahaemolyticus
del FipA del HubP,100,diffuse,190314,V. parahaemolyticus
del HubP,46.7,diffuse,190314,V. parahaemolyticus
WT,49.8,unipolar,190314,V. parahaemolyticus
del FipA,25.4,unipolar,190314,V. parahaemolyticus
del FipA del HubP,0,unipolar,190314,V. parahaemolyticus
del HubP,48.9,unipolar,190314,V. parahaemolyticus
WT,11.6,bipolar,190314,V. parahaemolyticus
del FipA,8.1,bipolar,190314,V. parahaemolyticus
del FipA del HubP,0,bipolar,190314,V. parahaemolyticus
del HubP,4.4,bipolar,190314,V. parahaemolyticus
WT,60.377358490566,unipolar,1,P. putida
del FipA,3.2967032967033,unipolar,1,P. putida
del HubP,17.7777777777778,unipolar,1,P. putida
del FipA del HubP,0,unipolar,1,P. putida
WT,13.2075471698113,bipolar,1,P. putida
del FipA,0,bipolar,1,P. putida
del HubP,2.22222222222222,bipolar,1,P. putida
del FipA del HubP,0,bipolar,1,P. putida
del HubP,1.96078431372549,subpolar,1,P. putida
WT,26.4150943396226,diffuse,1,P. putida
del FipA,96.7032967032967,diffuse,1,P. putida
del HubP,78.0392156862745,diffuse,1,P. putida
del FipA del HubP,100,diffuse,1,P. putida
WT,64.7058823529412,unipolar,2,P. putida
del FipA,1.85185185185185,unipolar,2,P. putida
del HubP,15.6862745098039,unipolar,2,P. putida
del FipA del HubP,0,unipolar,2,P. putida
WT,15.6862745098039,bipolar,2,P. putida
del FipA,0,bipolar,2,P. putida
del HubP,0,bipolar,2,P. putida
del FipA del HubP,0,bipolar,2,P. putida
del HubP,0,subpolar,2,P. putida
WT,19.6078431372549,diffuse,2,P. putida
del FipA,98.1481481481482,diffuse,2,P. putida
del HubP,84.3137254901961,diffuse,2,P. putida
del FipA del HubP,100,diffuse,2,P. putida
WT,64.2857142857143,unipolar,3,P. putida
del FipA,1.96078431372549,unipolar,3,P. putida
del HubP,13.0434782608696,unipolar,3,P. putida
del FipA del HubP,0,unipolar,3,P. putida
WT,14.2857142857143,bipolar,3,P. putida
del FipA,0,bipolar,3,P. putida
del HubP,0,bipolar,3,P. putida
del FipA del HubP,0,bipolar,3,P. putida
del HubP,0,subpolar,3,P. putida
WT,21.4285714285714,diffuse,3,P. putida
del FipA,98.0392156862745,diffuse,3,P. putida
del HubP,86.9565217391304,diffuse,3,P. putida
del FipA del HubP,100,diffuse,3,P. putida
WT,66.6666666666667,unipolar,4,P. putida
del FipA,3.17460317460317,unipolar,4,P. putida
del HubP,12.9032258064516,unipolar,4,P. putida
del FipA del HubP,0,unipolar,4,P. putida
WT,9.80392156862745,bipolar,4,P. putida
del FipA,0,bipolar,4,P. putida
del HubP,0,bipolar,4,P. putida
del FipA del HubP,0,bipolar,4,P. putida
del HubP,4.34782608695652,subpolar,4,P. putida
WT,23.5294117647059,diffuse,4,P. putida
del FipA,96.8253968253968,diffuse,4,P. putida
del HubP,82.7489481065919,diffuse,4,P. putida
del FipA del HubP,100,diffuse,4,P. putida
WT,62.5,unipolar,5,P. putida
del FipA,5.26315789473684,unipolar,5,P. putida
del HubP,13.3333333333333,unipolar,5,P. putida
del FipA del HubP,0,unipolar,5,P. putida
WT,12.5,bipolar,5,P. putida
del FipA,0,bipolar,5,P. putida
del HubP,0,bipolar,5,P. putida
del FipA del HubP,0,bipolar,5,P. putida
del HubP,0,subpolar,5,P. putida
WT,25,diffuse,5,P. putida
del FipA,94.7368421052632,diffuse,5,P. putida
del HubP,86.6666666666667,diffuse,5,P. putida
del FipA del HubP,100,diffuse,5,P. putida
WT,60.9756097560976,unipolar,6,P. putida
del FipA,2.04081632653061,unipolar,6,P. putida
del HubP,13.6363636363636,unipolar,6,P. putida
del FipA del HubP,0,unipolar,6,P. putida
WT,12.1951219512195,bipolar,6,P. putida
del FipA,0,bipolar,6,P. putida
del HubP,0,bipolar,6,P. putida
del FipA del HubP,0,bipolar,6,P. putida
del HubP,0,subpolar,6,P. putida
WT,26.8292682926829,diffuse,6,P. putida
del FipA,97.9591836734694,diffuse,6,P. putida
del HubP,86.3636363636364,diffuse,6,P. putida
del FipA del HubP,100,diffuse,6,P. putida
WT,65.9574468085106,unipolar,7,P. putida
del FipA,2.17391304347826,unipolar,7,P. putida
del HubP,13.8888888888889,unipolar,7,P. putida
del FipA del HubP,0,unipolar,7,P. putida
WT,6.38297872340426,bipolar,7,P. putida
del FipA,0,bipolar,7,P. putida
del HubP,0,bipolar,7,P. putida
del FipA del HubP,0,bipolar,7,P. putida
del HubP,0,subpolar,7,P. putida
WT,27.6595744680851,diffuse,7,P. putida
del FipA,97.8260869565217,diffuse,7,P. putida
del HubP,86.1111111111111,diffuse,7,P. putida
del FipA del HubP,100,diffuse,7,P. putida
WT,61.7021276595745,unipolar,8,P. putida
del FipA,4.16666666666667,unipolar,8,P. putida
del HubP,12.621359223301,unipolar,8,P. putida
del FipA del HubP,0,unipolar,8,P. putida
WT,12.7659574468085,bipolar,8,P. putida
del FipA,0,bipolar,8,P. putida
del HubP,0,bipolar,8,P. putida
del FipA del HubP,0,bipolar,8,P. putida
del HubP,0,subpolar,8,P. putida
WT,25.531914893617,diffuse,8,P. putida
del FipA,95.8333333333333,diffuse,8,P. putida
del HubP,87.378640776699,diffuse,8,P. putida
del FipA del HubP,100,diffuse,8,P. putida
WT,60.377358490566,unipolar,9,P. putida
del FipA,6,unipolar,9,P. putida
del HubP,10.7142857142857,unipolar,9,P. putida
del FipA del HubP,0,unipolar,9,P. putida
WT,9.43396226415094,bipolar,9,P. putida
del FipA,0,bipolar,9,P. putida
del HubP,0,bipolar,9,P. putida
del FipA del HubP,0,bipolar,9,P. putida
del HubP,0,subpolar,9,P. putida
WT,30.188679245283,diffuse,9,P. putida
del FipA,94,diffuse,9,P. putida
del HubP,89.2857142857143,diffuse,9,P. putida
del FipA del HubP,100,diffuse,9,P. putida
WT,66.6666666666667,unipolar,10,P. putida
del FipA,4.08163265306122,unipolar,10,P. putida
del HubP,12.7906976744186,unipolar,10,P. putida
del FipA del HubP,0,unipolar,10,P. putida
WT,6.25,bipolar,10,P. putida
del FipA,0,bipolar,10,P. putida
del HubP,0,bipolar,10,P. putida
del FipA del HubP,0,bipolar,10,P. putida
del HubP,0,subpolar,10,P. putida
WT,27.0833333333333,diffuse,10,P. putida
del FipA,95.9183673469388,diffuse,10,P. putida
del HubP,87.2093023255814,diffuse,10,P. putida
del FipA del HubP,100,diffuse,10,P. putida
WT,62.8571428571429,unipolar,11,P. putida
del FipA,2.32558139534884,unipolar,11,P. putida
del HubP,10.8108108108108,unipolar,11,P. putida
del FipA del HubP,0,unipolar,11,P. putida
WT,16.6666666666667,bipolar,11,P. putida
del FipA,0,bipolar,11,P. putida
del HubP,0,bipolar,11,P. putida
del FipA del HubP,0,bipolar,11,P. putida
del HubP,0,subpolar,11,P. putida
WT,20.4761904761905,diffuse,11,P. putida
del FipA,97.6744186046512,diffuse,11,P. putida
del HubP,89.1891891891892,diffuse,11,P. putida
del FipA del HubP,100,diffuse,11,P. putida
WT,62.5,unipolar,12,P. putida
del FipA,4.6875,unipolar,12,P. putida
del HubP,10.8108108108108,unipolar,12,P. putida
del FipA del HubP,0,unipolar,12,P. putida
WT,11.4285714285714,bipolar,12,P. putida
del FipA,0,bipolar,12,P. putida
del HubP,0,bipolar,12,P. putida
del FipA del HubP,0,bipolar,12,P. putida
del HubP,0,subpolar,12,P. putida
WT,26.0714285714286,diffuse,12,P. putida
del FipA,95.3125,diffuse,12,P. putida
del HubP,89.1891891891892,diffuse,12,P. putida
del FipA del HubP,100,diffuse,12,P. putida
WT,60.4651162790698,unipolar,13,P. putida
del FipA,1.42857142857143,unipolar,13,P. putida
del HubP,14.2857142857143,unipolar,13,P. putida
del FipA del HubP,0,unipolar,13,P. putida
WT,8.33333333333333,bipolar,13,P. putida
del FipA,0,bipolar,13,P. putida
del HubP,0,bipolar,13,P. putida
del FipA del HubP,0,bipolar,13,P. putida
del HubP,0,subpolar,13,P. putida
WT,31.2015503875969,diffuse,13,P. putida
del FipA,98.5714285714286,diffuse,13,P. putida
del HubP,85.7142857142857,diffuse,13,P. putida
del FipA del HubP,100,diffuse,13,P. putida
WT,66.6666666666667,unipolar,14,P. putida
del FipA,5,unipolar,14,P. putida
del HubP,16.1290322580645,unipolar,14,P. putida
del FipA del HubP,0,unipolar,14,P. putida
WT,6.97674418604651,bipolar,14,P. putida
del FipA,0,bipolar,14,P. putida
del HubP,0,bipolar,14,P. putida
del FipA del HubP,0,bipolar,14,P. putida
del HubP,0,subpolar,14,P. putida
WT,26.3565891472868,diffuse,14,P. putida
del FipA,95,diffuse,14,P. putida
del HubP,83.8709677419355,diffuse,14,P. putida
del FipA del HubP,100,diffuse,14,P. putida
WT,60,unipolar,15,P. putida
del FipA,5.71428571428571,unipolar,15,P. putida
del HubP,13.1578947368421,unipolar,15,P. putida
del FipA del HubP,0,unipolar,15,P. putida
WT,8.33333333333333,bipolar,15,P. putida
del FipA,0,bipolar,15,P. putida
del HubP,0,bipolar,15,P. putida
del FipA del HubP,0,bipolar,15,P. putida
del HubP,0,subpolar,15,P. putida
WT,31.6666666666667,diffuse,15,P. putida
del FipA,94.2857142857143,diffuse,15,P. putida
del HubP,86.8421052631579,diffuse,15,P. putida
del FipA del HubP,100,diffuse,15,P. putida
WT,85,unipolar,1,S. putrefaciens
del FipA,63,unipolar,1,S. putrefaciens
del HubP,89,unipolar,1,S. putrefaciens
del FipA del HubP,42,unipolar,1,S. putrefaciens
WT,7,bipolar,1,S. putrefaciens
del FipA,2,bipolar,1,S. putrefaciens
del HubP,6,bipolar,1,S. putrefaciens
del FipA del HubP,1,bipolar,1,S. putrefaciens
del FipA,2.85714285714286,subpolar,1,S. putrefaciens
del FipA del HubP,9.87654320987654,subpolar,1,S. putrefaciens
WT,8,diffuse,1,S. putrefaciens
del FipA,32.1428571428571,diffuse,1,S. putrefaciens
del HubP,5,diffuse,1,S. putrefaciens
del FipA del HubP,47.1234567901235,diffuse,1,S. putrefaciens
WT,91,unipolar,2,S. putrefaciens
del FipA,63,unipolar,2,S. putrefaciens
del HubP,87,unipolar,2,S. putrefaciens
del FipA del HubP,46,unipolar,2,S. putrefaciens
WT,6,bipolar,2,S. putrefaciens
del FipA,1,bipolar,2,S. putrefaciens
del HubP,9,bipolar,2,S. putrefaciens
del FipA del HubP,1,bipolar,2,S. putrefaciens
del FipA,2.98507462686567,subpolar,2,S. putrefaciens
del FipA del HubP,10,subpolar,2,S. putrefaciens
WT,3,diffuse,2,S. putrefaciens
del FipA,33.0149253731343,diffuse,2,S. putrefaciens
del HubP,4,diffuse,2,S. putrefaciens
del FipA del HubP,43,diffuse,2,S. putrefaciens
WT,85,unipolar,3,S. putrefaciens
del FipA,60,unipolar,3,S. putrefaciens
del HubP,85,unipolar,3,S. putrefaciens
del FipA del HubP,48,unipolar,3,S. putrefaciens
WT,7,bipolar,3,S. putrefaciens
del FipA,2,bipolar,3,S. putrefaciens
del HubP,8,bipolar,3,S. putrefaciens
del FipA del HubP,3,bipolar,3,S. putrefaciens
del FipA,3.17460317460317,subpolar,3,S. putrefaciens
del FipA del HubP,13.8461538461538,subpolar,3,S. putrefaciens
WT,8,diffuse,3,S. putrefaciens
del FipA,34.8253968253968,diffuse,3,S. putrefaciens
del HubP,7,diffuse,3,S. putrefaciens
del FipA del HubP,35.1538461538462,diffuse,3,S. putrefaciens
WT,87,unipolar,4,S. putrefaciens
del FipA,65,unipolar,4,S. putrefaciens
del HubP,87,unipolar,4,S. putrefaciens
del FipA del HubP,46,unipolar,4,S. putrefaciens
WT,11,bipolar,4,S. putrefaciens
del FipA,3,bipolar,4,S. putrefaciens
del HubP,6,bipolar,4,S. putrefaciens
del FipA del HubP,0,bipolar,4,S. putrefaciens
del FipA,3,subpolar,4,S. putrefaciens
del FipA del HubP,13.75,subpolar,4,S. putrefaciens
WT,2,diffuse,4,S. putrefaciens
del FipA,29,diffuse,4,S. putrefaciens
del HubP,7,diffuse,4,S. putrefaciens
del FipA del HubP,40.25,diffuse,4,S. putrefaciens
WT,85,unipolar,5,S. putrefaciens
del FipA,63,unipolar,5,S. putrefaciens
del HubP,83,unipolar,5,S. putrefaciens
del FipA del HubP,49,unipolar,5,S. putrefaciens
WT,7,bipolar,5,S. putrefaciens
del FipA,1,bipolar,5,S. putrefaciens
del HubP,11,bipolar,5,S. putrefaciens
del FipA del HubP,3,bipolar,5,S. putrefaciens
del FipA,4.47761194029851,subpolar,5,S. putrefaciens
del FipA del HubP,15.2542372881356,subpolar,5,S. putrefaciens
WT,8,diffuse,5,S. putrefaciens
del FipA,31.5223880597015,diffuse,5,S. putrefaciens
del HubP,6,diffuse,5,S. putrefaciens
del FipA del HubP,32.7457627118644,diffuse,5,S. putrefaciens
WT,87,unipolar,6,S. putrefaciens
del FipA,58,unipolar,6,S. putrefaciens
del HubP,83,unipolar,6,S. putrefaciens
del FipA del HubP,40,unipolar,6,S. putrefaciens
WT,7,bipolar,6,S. putrefaciens
del FipA,4,bipolar,6,S. putrefaciens
del HubP,6,bipolar,6,S. putrefaciens
del FipA del HubP,2,bipolar,6,S. putrefaciens
del FipA,3.63636363636364,subpolar,6,S. putrefaciens
del FipA del HubP,17.1428571428571,subpolar,6,S. putrefaciens
WT,6,diffuse,6,S. putrefaciens
del FipA,34.3636363636364,diffuse,6,S. putrefaciens
del HubP,11,diffuse,6,S. putrefaciens
del FipA del HubP,40.8571428571429,diffuse,6,S. putrefaciens
WT,88,unipolar,7,S. putrefaciens
del FipA,64,unipolar,7,S. putrefaciens
del HubP,87,unipolar,7,S. putrefaciens
del FipA del HubP,45,unipolar,7,S. putrefaciens
WT,7,bipolar,7,S. putrefaciens
del FipA,0,bipolar,7,S. putrefaciens
del HubP,7,bipolar,7,S. putrefaciens
del FipA del HubP,2,bipolar,7,S. putrefaciens
del FipA,8.33333333333333,subpolar,7,S. putrefaciens
del FipA del HubP,14.8936170212766,subpolar,7,S. putrefaciens
WT,5,diffuse,7,S. putrefaciens
del FipA,27.6666666666667,diffuse,7,S. putrefaciens
del HubP,6,diffuse,7,S. putrefaciens
del FipA del HubP,38.1063829787234,diffuse,7,S. putrefaciens
WT,87,unipolar,8,S. putrefaciens
del FipA,67,unipolar,8,S. putrefaciens
del HubP,86,unipolar,8,S. putrefaciens
del FipA del HubP,46,unipolar,8,S. putrefaciens
WT,8,bipolar,8,S. putrefaciens
del FipA,5,bipolar,8,S. putrefaciens
del HubP,7,bipolar,8,S. putrefaciens
del FipA del HubP,0,bipolar,8,S. putrefaciens
del FipA,7.14285714285714,subpolar,8,S. putrefaciens
del FipA del HubP,15.3846153846154,subpolar,8,S. putrefaciens
WT,5,diffuse,8,S. putrefaciens
del FipA,20.8571428571429,diffuse,8,S. putrefaciens
del HubP,7,diffuse,8,S. putrefaciens
del FipA del HubP,38.6153846153846,diffuse,8,S. putrefaciens
WT,83,unipolar,9,S. putrefaciens
del FipA,62,unipolar,9,S. putrefaciens
del HubP,86,unipolar,9,S. putrefaciens
del FipA del HubP,45,unipolar,9,S. putrefaciens
WT,7,bipolar,9,S. putrefaciens
del FipA,4,bipolar,9,S. putrefaciens
del HubP,7,bipolar,9,S. putrefaciens
del FipA del HubP,2,bipolar,9,S. putrefaciens
del FipA,7.69230769230769,subpolar,9,S. putrefaciens
del FipA del HubP,18.8679245283019,subpolar,9,S. putrefaciens
WT,10,diffuse,9,S. putrefaciens
del FipA,26.3076923076923,diffuse,9,S. putrefaciens
del HubP,7,diffuse,9,S. putrefaciens
del FipA del HubP,34.1320754716981,diffuse,9,S. putrefaciens
WT,88,unipolar,10,S. putrefaciens
del FipA,67,unipolar,10,S. putrefaciens
del HubP,85,unipolar,10,S. putrefaciens
del FipA del HubP,49,unipolar,10,S. putrefaciens
WT,11,bipolar,10,S. putrefaciens
del FipA,4,bipolar,10,S. putrefaciens
del HubP,8,bipolar,10,S. putrefaciens
del FipA del HubP,1,bipolar,10,S. putrefaciens
del FipA,3.84615384615385,subpolar,10,S. putrefaciens
del FipA del HubP,18.4615384615385,subpolar,10,S. putrefaciens
WT,1,diffuse,10,S. putrefaciens
del FipA,25.1538461538461,diffuse,10,S. putrefaciens
del HubP,7,diffuse,10,S. putrefaciens
del FipA del HubP,31.5384615384615,diffuse,10,S. putrefaciens
WT,85,unipolar,11,S. putrefaciens
del FipA,60,unipolar,11,S. putrefaciens
del HubP,87,unipolar,11,S. putrefaciens
del FipA del HubP,42,unipolar,11,S. putrefaciens
WT,7,bipolar,11,S. putrefaciens
del FipA,2,bipolar,11,S. putrefaciens
del HubP,8,bipolar,11,S. putrefaciens
del FipA del HubP,5,bipolar,11,S. putrefaciens
del FipA,2.08333333333333,subpolar,11,S. putrefaciens
del FipA del HubP,14.0845070422535,subpolar,11,S. putrefaciens
WT,8,diffuse,11,S. putrefaciens
del FipA,35.9166666666667,diffuse,11,S. putrefaciens
del HubP,5,diffuse,11,S. putrefaciens
del FipA del HubP,38.9154929577465,diffuse,11,S. putrefaciens
WT,83,unipolar,12,S. putrefaciens
del FipA,62,unipolar,12,S. putrefaciens
del HubP,84,unipolar,12,S. putrefaciens
del FipA del HubP,43,unipolar,12,S. putrefaciens
WT,7,bipolar,12,S. putrefaciens
del FipA,2,bipolar,12,S. putrefaciens
del HubP,6,bipolar,12,S. putrefaciens
del FipA del HubP,2,bipolar,12,S. putrefaciens
del FipA,8.49056603773585,subpolar,12,S. putrefaciens
del FipA del HubP,9.52380952380952,subpolar,12,S. putrefaciens
WT,10,diffuse,12,S. putrefaciens
del FipA,27.5094339622642,diffuse,12,S. putrefaciens
del HubP,10,diffuse,12,S. putrefaciens
del FipA del HubP,45.4761904761905,diffuse,12,S. putrefaciens
WT,84,unipolar,13,S. putrefaciens
del FipA,65,unipolar,13,S. putrefaciens
del HubP,84,unipolar,13,S. putrefaciens
del FipA del HubP,47,unipolar,13,S. putrefaciens
WT,5,bipolar,13,S. putrefaciens
del FipA,1,bipolar,13,S. putrefaciens
del HubP,8,bipolar,13,S. putrefaciens
del FipA del HubP,0,bipolar,13,S. putrefaciens
del FipA,8.64197530864197,subpolar,13,S. putrefaciens
del FipA del HubP,18.6274509803922,subpolar,13,S. putrefaciens
WT,11,diffuse,13,S. putrefaciens
del FipA,25.358024691358,diffuse,13,S. putrefaciens
del HubP,8,diffuse,13,S. putrefaciens
del FipA del HubP,34.3725490196078,diffuse,13,S. putrefaciens
WT,85,unipolar,14,S. putrefaciens
del FipA,60,unipolar,14,S. putrefaciens
del HubP,86,unipolar,14,S. putrefaciens
del FipA del HubP,44,unipolar,14,S. putrefaciens
WT,11,bipolar,14,S. putrefaciens
del FipA,1,bipolar,14,S. putrefaciens
del HubP,6,bipolar,14,S. putrefaciens
del FipA del HubP,2,bipolar,14,S. putrefaciens
del FipA,6.25,subpolar,14,S. putrefaciens
del FipA del HubP,13.6842105263158,subpolar,14,S. putrefaciens
WT,4,diffuse,14,S. putrefaciens
del FipA,32.75,diffuse,14,S. putrefaciens
del HubP,8,diffuse,14,S. putrefaciens
del FipA del HubP,40.3157894736842,diffuse,14,S. putrefaciens
WT,93,unipolar,15,S. putrefaciens
del FipA,68,unipolar,15,S. putrefaciens
del HubP,84,unipolar,15,S. putrefaciens
del FipA del HubP,43,unipolar,15,S. putrefaciens
WT,7,bipolar,15,S. putrefaciens
del FipA,0,bipolar,15,S. putrefaciens
del HubP,7,bipolar,15,S. putrefaciens
del FipA del HubP,2,bipolar,15,S. putrefaciens
del FipA,2.10526315789474,subpolar,15,S. putrefaciens
del FipA del HubP,11.5384615384615,subpolar,15,S. putrefaciens
WT,0,diffuse,15,S. putrefaciens
del FipA,29.8947368421053,diffuse,15,S. putrefaciens
del HubP,9,diffuse,15,S. putrefaciens
del FipA del HubP,43.4615384615385,diffuse,15,S. putrefaciens
FipA G104A,8.47457627118644,unipolar,1,P. putida
FipA L116A,12.5,unipolar,1,P. putida
FipA L123A,7.14285714285714,unipolar,1,P. putida
FipA G104A,91.5254237288136,diffuse,1,P. putida
FipA L116A,85.7142857142857,diffuse,1,P. putida
FipA L123A,92.8571428571429,diffuse,1,P. putida
FipA G104A,0,bipolar,1,P. putida
FipA L116A,1.78571428571429,bipolar,1,P. putida
FipA L123A,0,bipolar,1,P. putida
FipA G104A,8.33333333333333,unipolar,2,P. putida
FipA L116A,13.4328358208955,unipolar,2,P. putida
FipA L123A,8.33333333333333,unipolar,2,P. putida
FipA G104A,91.6666666666667,diffuse,2,P. putida
FipA L116A,86.5671641791045,diffuse,2,P. putida
FipA L123A,91.6666666666667,diffuse,2,P. putida
FipA G104A,0,bipolar,2,P. putida
FipA L116A,0,bipolar,2,P. putida
FipA L123A,0,bipolar,2,P. putida
FipA L116A,10.1449275362319,unipolar,3,P. putida
FipA L123A,8.62068965517241,unipolar,3,P. putida
FipA L116A,88.4057971014493,diffuse,3,P. putida
FipA L123A,91.3793103448276,diffuse,3,P. putida
FipA L116A,1.44927536231884,bipolar,3,P. putida
FipA L123A,0,bipolar,3,P. putida
FipA G104A,9.80392156862745,unipolar,4,P. putida
FipA L116A,8.88888888888889,unipolar,4,P. putida
FipA L123A,10.3448275862069,unipolar,4,P. putida
FipA G104A,90.1960784313726,diffuse,4,P. putida
FipA L116A,91.1111111111111,diffuse,4,P. putida
FipA L123A,89.6551724137931,diffuse,4,P. putida
FipA G104A,0,bipolar,4,P. putida
FipA L116A,0,bipolar,4,P. putida
FipA L123A,0,bipolar,4,P. putida
FipA G104A,9.30232558139535,unipolar,5,P. putida
FipA L116A,10.7142857142857,unipolar,5,P. putida
FipA L123A,7.79220779220779,unipolar,5,P. putida
FipA G104A,90.6976744186047,diffuse,5,P. putida
FipA L116A,88.0952380952381,diffuse,5,P. putida
FipA L123A,92.2077922077922,diffuse,5,P. putida
FipA G104A,0,bipolar,5,P. putida
FipA L116A,1.19047619047619,bipolar,5,P. putida
FipA L123A,0,bipolar,5,P. putida
FipA G104A,7.14285714285714,unipolar,6,P. putida
FipA L116A,9.30232558139535,unipolar,6,P. putida
FipA L123A,9.43396226415094,unipolar,6,P. putida
FipA G104A,92.8571428571429,diffuse,6,P. putida
FipA L116A,88.3720930232558,diffuse,6,P. putida
FipA L123A,90.5660377358491,diffuse,6,P. putida
FipA G104A,0,bipolar,6,P. putida
FipA L116A,2.32558139534884,bipolar,6,P. putida
FipA L123A,0,bipolar,6,P. putida
FipA G104A,8.51063829787234,unipolar,7,P. putida
FipA L116A,12.7272727272727,unipolar,7,P. putida
FipA L123A,8.06451612903226,unipolar,7,P. putida
FipA G104A,91.4893617021277,diffuse,7,P. putida
FipA L116A,87.2727272727273,diffuse,7,P. putida
FipA L123A,91.9354838709677,diffuse,7,P. putida
FipA G104A,0,bipolar,7,P. putida
FipA L116A,0,bipolar,7,P. putida
FipA L123A,0,bipolar,7,P. putida
FipA G104A,7.69230769230769,unipolar,8,P. putida
FipA L116A,8.95522388059702,unipolar,8,P. putida
FipA L123A,7.5,unipolar,8,P. putida
FipA G104A,92.3076923076923,diffuse,8,P. putida
FipA L116A,91.044776119403,diffuse,8,P. putida
FipA L123A,92.5,diffuse,8,P. putida
FipA G104A,0,bipolar,8,P. putida
FipA L116A,0,bipolar,8,P. putida
FipA L123A,0,bipolar,8,P. putida
FipA G104A,6.81818181818182,unipolar,9,P. putida
FipA L116A,10.9090909090909,unipolar,9,P. putida
FipA L123A,8.06451612903226,unipolar,9,P. putida
FipA G104A,93.1818181818182,diffuse,9,P. putida
FipA L116A,89.0909090909091,diffuse,9,P. putida
FipA L123A,91.9354838709677,diffuse,9,P. putida
FipA G104A,0,bipolar,9,P. putida
FipA L116A,0,bipolar,9,P. putida
FipA L123A,0,bipolar,9,P. putida
FipA G104A,6.52173913043478,unipolar,10,P. putida
FipA L116A,10.5263157894737,unipolar,10,P. putida
FipA L123A,8.92857142857143,unipolar,10,P. putida
FipA G104A,93.4782608695652,diffuse,10,P. putida
FipA L116A,86.8421052631579,diffuse,10,P. putida
FipA L123A,91.0714285714286,diffuse,10,P. putida
FipA G104A,0,bipolar,10,P. putida
FipA L116A,2.63157894736842,bipolar,10,P. putida
FipA L123A,0,bipolar,10,P. putida
FipA G104A,8,unipolar,11,P. putida
FipA L116A,12.1621621621622,unipolar,11,P. putida
FipA L123A,8.69565217391304,unipolar,11,P. putida
FipA G104A,92,diffuse,11,P. putida
FipA L116A,87.8378378378378,diffuse,11,P. putida
FipA L123A,91.304347826087,diffuse,11,P. putida
FipA G104A,0,bipolar,11,P. putida
FipA L116A,0,bipolar,11,P. putida
FipA L123A,0,bipolar,11,P. putida
FipA G104A,8.23529411764706,unipolar,12,P. putida
FipA L116A,11.2359550561798,unipolar,12,P. putida
FipA L123A,8.69565217391304,unipolar,12,P. putida
FipA G104A,91.7647058823529,diffuse,12,P. putida
FipA L116A,88.7640449438202,diffuse,12,P. putida
FipA L123A,91.304347826087,diffuse,12,P. putida
FipA G104A,0,bipolar,12,P. putida
FipA L116A,0,bipolar,12,P. putida
FipA L123A,0,bipolar,12,P. putida
FipA G104A,7.60869565217391,unipolar,13,P. putida
FipA L116A,9.30232558139535,unipolar,13,P. putida
FipA L123A,9.67741935483871,unipolar,13,P. putida
FipA G104A,92.3913043478261,diffuse,13,P. putida
FipA L116A,90.6976744186047,diffuse,13,P. putida
FipA L123A,90.3225806451613,diffuse,13,P. putida
FipA G104A,0,bipolar,13,P. putida
FipA L116A,0,bipolar,13,P. putida
FipA L123A,0,bipolar,13,P. putida
FipA G104A,10.1449275362319,unipolar,14,P. putida
FipA L116A,10,unipolar,14,P. putida
FipA L123A,6.12244897959184,unipolar,14,P. putida
FipA G104A,89.8550724637681,diffuse,14,P. putida
FipA L116A,88.5714285714286,diffuse,14,P. putida
FipA L123A,93.8775510204082,diffuse,14,P. putida
FipA G104A,0,bipolar,14,P. putida
FipA L116A,1.42857142857143,bipolar,14,P. putida
FipA L123A,0,bipolar,14,P. putida
FipA G104A,8.19913831863456,unipolar,15,P. putida
FipA L116A,10.7715435462764,unipolar,15,P. putida
FipA L123A,8.38690386734436,unipolar,15,P. putida
FipA G104A,91.8008616813654,diffuse,15,P. putida
FipA L116A,88.4562280530238,diffuse,15,P. putida
FipA L123A,91.6130961326556,diffuse,15,P. putida
FipA G104A,0,bipolar,15,P. putida
FipA L116A,0.772228400699858,bipolar,15,P. putida
FipA L123A,0,bipolar,15,P. putida

## Sheet: Fig.3 Source Data 2
FlhF intensity,,,
Intensity,Replicate,Genotype,Strain
227,1,del FipA,V. parahaemolyticus RIMD 2210633
262,1,del FipA,V. parahaemolyticus RIMD 2210633
237,1,del FipA,V. parahaemolyticus RIMD 2210633
239,1,del FipA,V. parahaemolyticus RIMD 2210633
226,1,del FipA,V. parahaemolyticus RIMD 2210633
224,1,del FipA,V. parahaemolyticus RIMD 2210633
241,1,del FipA,V. parahaemolyticus RIMD 2210633
226,1,del FipA,V. parahaemolyticus RIMD 2210633
292,1,del FipA,V. parahaemolyticus RIMD 2210633
293,1,del FipA,V. parahaemolyticus RIMD 2210633
239,1,del FipA,V. parahaemolyticus RIMD 2210633
277,1,del FipA,V. parahaemolyticus RIMD 2210633
271,1,del FipA,V. parahaemolyticus RIMD 2210633
261,1,del FipA,V. parahaemolyticus RIMD 2210633
244,1,del FipA,V. parahaemolyticus RIMD 2210633
230,1,del FipA,V. parahaemolyticus RIMD 2210633
237,1,del FipA,V. parahaemolyticus RIMD 2210633
245,1,del FipA,V. parahaemolyticus RIMD 2210633
279,1,del FipA,V. parahaemolyticus RIMD 2210633
267,1,del FipA,V. parahaemolyticus RIMD 2210633
248,1,del FipA,V. parahaemolyticus RIMD 2210633
272,1,del FipA,V. parahaemolyticus RIMD 2210633
296,1,del FipA,V. parahaemolyticus RIMD 2210633
235,1,del FipA,V. parahaemolyticus RIMD 2210633
229,1,del FipA,V. parahaemolyticus RIMD 2210633
284,1,del FipA,V. parahaemolyticus RIMD 2210633
234,1,del FipA,V. parahaemolyticus RIMD 2210633
240,1,del FipA,V. parahaemolyticus RIMD 2210633
238,1,del FipA,V. parahaemolyticus RIMD 2210633
292,1,del FipA,V. parahaemolyticus RIMD 2210633
315,1,del FipA,V. parahaemolyticus RIMD 2210633
261,1,del FipA,V. parahaemolyticus RIMD 2210633
247,1,del FipA,V. parahaemolyticus RIMD 2210633
260,1,del FipA,V. parahaemolyticus RIMD 2210633
301,1,del FipA,V. parahaemolyticus RIMD 2210633
290,1,del FipA,V. parahaemolyticus RIMD 2210633
278,1,del FipA,V. parahaemolyticus RIMD 2210633
280,1,del FipA,V. parahaemolyticus RIMD 2210633
274,1,del FipA,V. parahaemolyticus RIMD 2210633
303,1,del FipA,V. parahaemolyticus RIMD 2210633
285,1,del FipA,V. parahaemolyticus RIMD 2210633
305,1,del FipA,V. parahaemolyticus RIMD 2210633
303,1,del FipA,V. parahaemolyticus RIMD 2210633
343,1,del FipA,V. parahaemolyticus RIMD 2210633
316,1,del FipA,V. parahaemolyticus RIMD 2210633
356,1,del FipA,V. parahaemolyticus RIMD 2210633
273,1,del FipA,V. parahaemolyticus RIMD 2210633
312,1,del FipA,V. parahaemolyticus RIMD 2210633
301,1,del FipA,V. parahaemolyticus RIMD 2210633
363,1,del FipA,V. parahaemolyticus RIMD 2210633
373,1,del FipA,V. parahaemolyticus RIMD 2210633
385,1,del FipA,V. parahaemolyticus RIMD 2210633
249,1,del FipA,V. parahaemolyticus RIMD 2210633
378,1,del FipA,V. parahaemolyticus RIMD 2210633
343,1,del FipA,V. parahaemolyticus RIMD 2210633
330,1,del FipA,V. parahaemolyticus RIMD 2210633
286,1,del FipA,V. parahaemolyticus RIMD 2210633
311,1,del FipA,V. parahaemolyticus RIMD 2210633
303,1,del FipA,V. parahaemolyticus RIMD 2210633
345,1,del FipA,V. parahaemolyticus RIMD 2210633
333,1,del FipA,V. parahaemolyticus RIMD 2210633
510,1,del FipA,V. parahaemolyticus RIMD 2210633
324,1,del FipA,V. parahaemolyticus RIMD 2210633
486,1,del FipA,V. parahaemolyticus RIMD 2210633
263,1,del FipA,V. parahaemolyticus RIMD 2210633
249,1,del FipA,V. parahaemolyticus RIMD 2210633
351,1,del FipA,V. parahaemolyticus RIMD 2210633
321,1,del FipA,V. parahaemolyticus RIMD 2210633
340,1,del FipA,V. parahaemolyticus RIMD 2210633
386,1,del FipA,V. parahaemolyticus RIMD 2210633
292,1,del FipA,V. parahaemolyticus RIMD 2210633
324,1,del FipA,V. parahaemolyticus RIMD 2210633
332,1,del FipA,V. parahaemolyticus RIMD 2210633
293,1,del FipA,V. parahaemolyticus RIMD 2210633
290,1,del FipA,V. parahaemolyticus RIMD 2210633
245,1,del FipA,V. parahaemolyticus RIMD 2210633
256,1,del FipA,V. parahaemolyticus RIMD 2210633
241,1,del FipA,V. parahaemolyticus RIMD 2210633
263,1,del FipA,V. parahaemolyticus RIMD 2210633
375,1,del FipA,V. parahaemolyticus RIMD 2210633
256,1,del FipA,V. parahaemolyticus RIMD 2210633
256,1,del FipA,V. parahaemolyticus RIMD 2210633
244,1,del FipA,V. parahaemolyticus RIMD 2210633
237,1,del FipA,V. parahaemolyticus RIMD 2210633
255,1,del FipA,V. parahaemolyticus RIMD 2210633
247,1,del FipA,V. parahaemolyticus RIMD 2210633
372,1,del FipA,V. parahaemolyticus RIMD 2210633
310,2,del FipA,V. parahaemolyticus RIMD 2210633
240,2,del FipA,V. parahaemolyticus RIMD 2210633
242,2,del FipA,V. parahaemolyticus RIMD 2210633
253,2,del FipA,V. parahaemolyticus RIMD 2210633
229,2,del FipA,V. parahaemolyticus RIMD 2210633
231,2,del FipA,V. parahaemolyticus RIMD 2210633
267,2,del FipA,V. parahaemolyticus RIMD 2210633
394,2,del FipA,V. parahaemolyticus RIMD 2210633
278,2,del FipA,V. parahaemolyticus RIMD 2210633
246,2,del FipA,V. parahaemolyticus RIMD 2210633
274,2,del FipA,V. parahaemolyticus RIMD 2210633
261,2,del FipA,V. parahaemolyticus RIMD 2210633
236,2,del FipA,V. parahaemolyticus RIMD 2210633
239,2,del FipA,V. parahaemolyticus RIMD 2210633
282,2,del FipA,V. parahaemolyticus RIMD 2210633
251,2,del FipA,V. parahaemolyticus RIMD 2210633
377,2,del FipA,V. parahaemolyticus RIMD 2210633
315,2,del FipA,V. parahaemolyticus RIMD 2210633
254,2,del FipA,V. parahaemolyticus RIMD 2210633
235,2,del FipA,V. parahaemolyticus RIMD 2210633
269,2,del FipA,V. parahaemolyticus RIMD 2210633
266,2,del FipA,V. parahaemolyticus RIMD 2210633
256,2,del FipA,V. parahaemolyticus RIMD 2210633
302,2,del FipA,V. parahaemolyticus RIMD 2210633
267,2,del FipA,V. parahaemolyticus RIMD 2210633
454,2,del FipA,V. parahaemolyticus RIMD 2210633
272,2,del FipA,V. parahaemolyticus RIMD 2210633
268,2,del FipA,V. parahaemolyticus RIMD 2210633
278,2,del FipA,V. parahaemolyticus RIMD 2210633
270,2,del FipA,V. parahaemolyticus RIMD 2210633
264,2,del FipA,V. parahaemolyticus RIMD 2210633
281,2,del FipA,V. parahaemolyticus RIMD 2210633
292,2,del FipA,V. parahaemolyticus RIMD 2210633
314,2,del FipA,V. parahaemolyticus RIMD 2210633
322,2,del FipA,V. parahaemolyticus RIMD 2210633
347,2,del FipA,V. parahaemolyticus RIMD 2210633
276,2,del FipA,V. parahaemolyticus RIMD 2210633
297,2,del FipA,V. parahaemolyticus RIMD 2210633
285,2,del FipA,V. parahaemolyticus RIMD 2210633
298,2,del FipA,V. parahaemolyticus RIMD 2210633
276,2,del FipA,V. parahaemolyticus RIMD 2210633
287,2,del FipA,V. parahaemolyticus RIMD 2210633
294,2,del FipA,V. parahaemolyticus RIMD 2210633
297,2,del FipA,V. parahaemolyticus RIMD 2210633
233,2,del FipA,V. parahaemolyticus RIMD 2210633
274,2,del FipA,V. parahaemolyticus RIMD 2210633
271,2,del FipA,V. parahaemolyticus RIMD 2210633
415,2,del FipA,V. parahaemolyticus RIMD 2210633
229,2,del FipA,V. parahaemolyticus RIMD 2210633
260,2,del FipA,V. parahaemolyticus RIMD 2210633
270,2,del FipA,V. parahaemolyticus RIMD 2210633
289,2,del FipA,V. parahaemolyticus RIMD 2210633
257,2,del FipA,V. parahaemolyticus RIMD 2210633
279,2,del FipA,V. parahaemolyticus RIMD 2210633
261,2,del FipA,V. parahaemolyticus RIMD 2210633
291,2,del FipA,V. parahaemolyticus RIMD 2210633
286,2,del FipA,V. parahaemolyticus RIMD 2210633
326,2,del FipA,V. parahaemolyticus RIMD 2210633
412,2,del FipA,V. parahaemolyticus RIMD 2210633
241,2,del FipA,V. parahaemolyticus RIMD 2210633
273,2,del FipA,V. parahaemolyticus RIMD 2210633
284,2,del FipA,V. parahaemolyticus RIMD 2210633
246,2,del FipA,V. parahaemolyticus RIMD 2210633
299,2,del FipA,V. parahaemolyticus RIMD 2210633
283,2,del FipA,V. parahaemolyticus RIMD 2210633
249,2,del FipA,V. parahaemolyticus RIMD 2210633
234,2,del FipA,V. parahaemolyticus RIMD 2210633
278,2,del FipA,V. parahaemolyticus RIMD 2210633
271,2,del FipA,V. parahaemolyticus RIMD 2210633
287,2,del FipA,V. parahaemolyticus RIMD 2210633
277,2,del FipA,V. parahaemolyticus RIMD 2210633
265,2,del FipA,V. parahaemolyticus RIMD 2210633
241,2,del FipA,V. parahaemolyticus RIMD 2210633
244,2,del FipA,V. parahaemolyticus RIMD 2210633
272,2,del FipA,V. parahaemolyticus RIMD 2210633
317,2,del FipA,V. parahaemolyticus RIMD 2210633
249,2,del FipA,V. parahaemolyticus RIMD 2210633
277,2,del FipA,V. parahaemolyticus RIMD 2210633
296,2,del FipA,V. parahaemolyticus RIMD 2210633
250,2,del FipA,V. parahaemolyticus RIMD 2210633
244,2,del FipA,V. parahaemolyticus RIMD 2210633
296,2,del FipA,V. parahaemolyticus RIMD 2210633
234,2,del FipA,V. parahaemolyticus RIMD 2210633
481,2,del FipA,V. parahaemolyticus RIMD 2210633
287,2,del FipA,V. parahaemolyticus RIMD 2210633
324,2,del FipA,V. parahaemolyticus RIMD 2210633
309,2,del FipA,V. parahaemolyticus RIMD 2210633
263,2,del FipA,V. parahaemolyticus RIMD 2210633
289,2,del FipA,V. parahaemolyticus RIMD 2210633
310,2,del FipA,V. parahaemolyticus RIMD 2210633
286,2,del FipA,V. parahaemolyticus RIMD 2210633
284,2,del FipA,V. parahaemolyticus RIMD 2210633
278,2,del FipA,V. parahaemolyticus RIMD 2210633
286,2,del FipA,V. parahaemolyticus RIMD 2210633
327,2,del FipA,V. parahaemolyticus RIMD 2210633
273,2,del FipA,V. parahaemolyticus RIMD 2210633
305,2,del FipA,V. parahaemolyticus RIMD 2210633
258,2,del FipA,V. parahaemolyticus RIMD 2210633
233,2,del FipA,V. parahaemolyticus RIMD 2210633
248,2,del FipA,V. parahaemolyticus RIMD 2210633
304,2,del FipA,V. parahaemolyticus RIMD 2210633
280,2,del FipA,V. parahaemolyticus RIMD 2210633
298,2,del FipA,V. parahaemolyticus RIMD 2210633
312,2,del FipA,V. parahaemolyticus RIMD 2210633
251,2,del FipA,V. parahaemolyticus RIMD 2210633
294,2,del FipA,V. parahaemolyticus RIMD 2210633
262,2,del FipA,V. parahaemolyticus RIMD 2210633
252,2,del FipA,V. parahaemolyticus RIMD 2210633
252,2,del FipA,V. parahaemolyticus RIMD 2210633
276,2,del FipA,V. parahaemolyticus RIMD 2210633
291,2,del FipA,V. parahaemolyticus RIMD 2210633
275,2,del FipA,V. parahaemolyticus RIMD 2210633
292,2,del FipA,V. parahaemolyticus RIMD 2210633
419,2,del FipA,V. parahaemolyticus RIMD 2210633
398,2,del FipA,V. parahaemolyticus RIMD 2210633
385,2,del FipA,V. parahaemolyticus RIMD 2210633
368,2,del FipA,V. parahaemolyticus RIMD 2210633
350,2,del FipA,V. parahaemolyticus RIMD 2210633
407,2,del FipA,V. parahaemolyticus RIMD 2210633
377,2,del FipA,V. parahaemolyticus RIMD 2210633
254,2,del FipA,V. parahaemolyticus RIMD 2210633
241,2,del FipA,V. parahaemolyticus RIMD 2210633
305,2,del FipA,V. parahaemolyticus RIMD 2210633
248,3,del FipA,V. parahaemolyticus RIMD 2210633
313,3,del FipA,V. parahaemolyticus RIMD 2210633
231,3,del FipA,V. parahaemolyticus RIMD 2210633
231,3,del FipA,V. parahaemolyticus RIMD 2210633
231,3,del FipA,V. parahaemolyticus RIMD 2210633
250,3,del FipA,V. parahaemolyticus RIMD 2210633
244,3,del FipA,V. parahaemolyticus RIMD 2210633
326,3,del FipA,V. parahaemolyticus RIMD 2210633
261,3,del FipA,V. parahaemolyticus RIMD 2210633
236,3,del FipA,V. parahaemolyticus RIMD 2210633
309,3,del FipA,V. parahaemolyticus RIMD 2210633
235,3,del FipA,V. parahaemolyticus RIMD 2210633
268,3,del FipA,V. parahaemolyticus RIMD 2210633
254,3,del FipA,V. parahaemolyticus RIMD 2210633
246,3,del FipA,V. parahaemolyticus RIMD 2210633
270,3,del FipA,V. parahaemolyticus RIMD 2210633
307,3,del FipA,V. parahaemolyticus RIMD 2210633
264,3,del FipA,V. parahaemolyticus RIMD 2210633
232,3,del FipA,V. parahaemolyticus RIMD 2210633
507,3,del FipA,V. parahaemolyticus RIMD 2210633
268,3,del FipA,V. parahaemolyticus RIMD 2210633
238,3,del FipA,V. parahaemolyticus RIMD 2210633
232,3,del FipA,V. parahaemolyticus RIMD 2210633
374,3,del FipA,V. parahaemolyticus RIMD 2210633
628,3,del FipA,V. parahaemolyticus RIMD 2210633
400,3,del FipA,V. parahaemolyticus RIMD 2210633
251,3,del FipA,V. parahaemolyticus RIMD 2210633
251,3,del FipA,V. parahaemolyticus RIMD 2210633
240,3,del FipA,V. parahaemolyticus RIMD 2210633
259,3,del FipA,V. parahaemolyticus RIMD 2210633
277,3,del FipA,V. parahaemolyticus RIMD 2210633
262,3,del FipA,V. parahaemolyticus RIMD 2210633
258,3,del FipA,V. parahaemolyticus RIMD 2210633
242,3,del FipA,V. parahaemolyticus RIMD 2210633
300,3,del FipA,V. parahaemolyticus RIMD 2210633
234,3,del FipA,V. parahaemolyticus RIMD 2210633
226,3,del FipA,V. parahaemolyticus RIMD 2210633
223,3,del FipA,V. parahaemolyticus RIMD 2210633
224,3,del FipA,V. parahaemolyticus RIMD 2210633
274,3,del FipA,V. parahaemolyticus RIMD 2210633
264,3,del FipA,V. parahaemolyticus RIMD 2210633
247,3,del FipA,V. parahaemolyticus RIMD 2210633
233,3,del FipA,V. parahaemolyticus RIMD 2210633
240,3,del FipA,V. parahaemolyticus RIMD 2210633
237,3,del FipA,V. parahaemolyticus RIMD 2210633
254,3,del FipA,V. parahaemolyticus RIMD 2210633
266,3,del FipA,V. parahaemolyticus RIMD 2210633
238,3,del FipA,V. parahaemolyticus RIMD 2210633
247,3,del FipA,V. parahaemolyticus RIMD 2210633
249,3,del FipA,V. parahaemolyticus RIMD 2210633
235,3,del FipA,V. parahaemolyticus RIMD 2210633
314,3,del FipA,V. parahaemolyticus RIMD 2210633
251,3,del FipA,V. parahaemolyticus RIMD 2210633
260,3,del FipA,V. parahaemolyticus RIMD 2210633
233,3,del FipA,V. parahaemolyticus RIMD 2210633
275,3,del FipA,V. parahaemolyticus RIMD 2210633
302,3,del FipA,V. parahaemolyticus RIMD 2210633
286,3,del FipA,V. parahaemolyticus RIMD 2210633
298,3,del FipA,V. parahaemolyticus RIMD 2210633
281,3,del FipA,V. parahaemolyticus RIMD 2210633
253,3,del FipA,V. parahaemolyticus RIMD 2210633
412,3,del FipA,V. parahaemolyticus RIMD 2210633
296,3,del FipA,V. parahaemolyticus RIMD 2210633
300,3,del FipA,V. parahaemolyticus RIMD 2210633
265,3,del FipA,V. parahaemolyticus RIMD 2210633
243,3,del FipA,V. parahaemolyticus RIMD 2210633
238,3,del FipA,V. parahaemolyticus RIMD 2210633
249,3,del FipA,V. parahaemolyticus RIMD 2210633
258,3,del FipA,V. parahaemolyticus RIMD 2210633
309,3,del FipA,V. parahaemolyticus RIMD 2210633
277,3,del FipA,V. parahaemolyticus RIMD 2210633
244,3,del FipA,V. parahaemolyticus RIMD 2210633
256,3,del FipA,V. parahaemolyticus RIMD 2210633
243,3,del FipA,V. parahaemolyticus RIMD 2210633
235,3,del FipA,V. parahaemolyticus RIMD 2210633
234,3,del FipA,V. parahaemolyticus RIMD 2210633
293,3,del FipA,V. parahaemolyticus RIMD 2210633
235,3,del FipA,V. parahaemolyticus RIMD 2210633
271,3,del FipA,V. parahaemolyticus RIMD 2210633
275,3,del FipA,V. parahaemolyticus RIMD 2210633
279,3,del FipA,V. parahaemolyticus RIMD 2210633
267,3,del FipA,V. parahaemolyticus RIMD 2210633
230,3,del FipA,V. parahaemolyticus RIMD 2210633
230,3,del FipA,V. parahaemolyticus RIMD 2210633
316,3,del FipA,V. parahaemolyticus RIMD 2210633
334,3,del FipA,V. parahaemolyticus RIMD 2210633
299,3,del FipA,V. parahaemolyticus RIMD 2210633
266,3,del FipA,V. parahaemolyticus RIMD 2210633
267,3,del FipA,V. parahaemolyticus RIMD 2210633
250,3,del FipA,V. parahaemolyticus RIMD 2210633
253,3,del FipA,V. parahaemolyticus RIMD 2210633
340,3,del FipA,V. parahaemolyticus RIMD 2210633
252,3,del FipA,V. parahaemolyticus RIMD 2210633
246,3,del FipA,V. parahaemolyticus RIMD 2210633
249,3,del FipA,V. parahaemolyticus RIMD 2210633
270,3,del FipA,V. parahaemolyticus RIMD 2210633
287,3,del FipA,V. parahaemolyticus RIMD 2210633
246,3,del FipA,V. parahaemolyticus RIMD 2210633
261,3,del FipA,V. parahaemolyticus RIMD 2210633
264,3,del FipA,V. parahaemolyticus RIMD 2210633
279,3,del FipA,V. parahaemolyticus RIMD 2210633
244,3,del FipA,V. parahaemolyticus RIMD 2210633
254,3,del FipA,V. parahaemolyticus RIMD 2210633
300,3,del FipA,V. parahaemolyticus RIMD 2210633
289,3,del FipA,V. parahaemolyticus RIMD 2210633
271,3,del FipA,V. parahaemolyticus RIMD 2210633
260,3,del FipA,V. parahaemolyticus RIMD 2210633
344,3,del FipA,V. parahaemolyticus RIMD 2210633
234,3,del FipA,V. parahaemolyticus RIMD 2210633
280,3,del FipA,V. parahaemolyticus RIMD 2210633
281,3,del FipA,V. parahaemolyticus RIMD 2210633
272,3,del FipA,V. parahaemolyticus RIMD 2210633
240,3,del FipA,V. parahaemolyticus RIMD 2210633
298,1,wild type,V. parahaemolyticus RIMD 2210633
534,1,wild type,V. parahaemolyticus RIMD 2210633
359,1,wild type,V. parahaemolyticus RIMD 2210633
418,1,wild type,V. parahaemolyticus RIMD 2210633
247,1,wild type,V. parahaemolyticus RIMD 2210633
391,1,wild type,V. parahaemolyticus RIMD 2210633
244,1,wild type,V. parahaemolyticus RIMD 2210633
234,1,wild type,V. parahaemolyticus RIMD 2210633
331,1,wild type,V. parahaemolyticus RIMD 2210633
290,1,wild type,V. parahaemolyticus RIMD 2210633
345,1,wild type,V. parahaemolyticus RIMD 2210633
316,1,wild type,V. parahaemolyticus RIMD 2210633
279,1,wild type,V. parahaemolyticus RIMD 2210633
228,1,wild type,V. parahaemolyticus RIMD 2210633
408,1,wild type,V. parahaemolyticus RIMD 2210633
374,1,wild type,V. parahaemolyticus RIMD 2210633
352,1,wild type,V. parahaemolyticus RIMD 2210633
287,1,wild type,V. parahaemolyticus RIMD 2210633
307,1,wild type,V. parahaemolyticus RIMD 2210633
472,1,wild type,V. parahaemolyticus RIMD 2210633
422,1,wild type,V. parahaemolyticus RIMD 2210633
316,1,wild type,V. parahaemolyticus RIMD 2210633
277,1,wild type,V. parahaemolyticus RIMD 2210633
247,1,wild type,V. parahaemolyticus RIMD 2210633
426,1,wild type,V. parahaemolyticus RIMD 2210633
322,1,wild type,V. parahaemolyticus RIMD 2210633
388,1,wild type,V. parahaemolyticus RIMD 2210633
234,1,wild type,V. parahaemolyticus RIMD 2210633
318,1,wild type,V. parahaemolyticus RIMD 2210633
247,1,wild type,V. parahaemolyticus RIMD 2210633
569,1,wild type,V. parahaemolyticus RIMD 2210633
324,1,wild type,V. parahaemolyticus RIMD 2210633
364,1,wild type,V. parahaemolyticus RIMD 2210633
314,1,wild type,V. parahaemolyticus RIMD 2210633
686,1,wild type,V. parahaemolyticus RIMD 2210633
308,1,wild type,V. parahaemolyticus RIMD 2210633
387,1,wild type,V. parahaemolyticus RIMD 2210633
506,1,wild type,V. parahaemolyticus RIMD 2210633
612,1,wild type,V. parahaemolyticus RIMD 2210633
665,1,wild type,V. parahaemolyticus RIMD 2210633
471,1,wild type,V. parahaemolyticus RIMD 2210633
346,1,wild type,V. parahaemolyticus RIMD 2210633
340,1,wild type,V. parahaemolyticus RIMD 2210633
357,1,wild type,V. parahaemolyticus RIMD 2210633
358,1,wild type,V. parahaemolyticus RIMD 2210633
372,1,wild type,V. parahaemolyticus RIMD 2210633
243,1,wild type,V. parahaemolyticus RIMD 2210633
551,1,wild type,V. parahaemolyticus RIMD 2210633
500,1,wild type,V. parahaemolyticus RIMD 2210633
481,1,wild type,V. parahaemolyticus RIMD 2210633
476,1,wild type,V. parahaemolyticus RIMD 2210633
279,1,wild type,V. parahaemolyticus RIMD 2210633
508,1,wild type,V. parahaemolyticus RIMD 2210633
491,1,wild type,V. parahaemolyticus RIMD 2210633
281,1,wild type,V. parahaemolyticus RIMD 2210633
679,1,wild type,V. parahaemolyticus RIMD 2210633
584,1,wild type,V. parahaemolyticus RIMD 2210633
283,1,wild type,V. parahaemolyticus RIMD 2210633
604,1,wild type,V. parahaemolyticus RIMD 2210633
489,1,wild type,V. parahaemolyticus RIMD 2210633
306,1,wild type,V. parahaemolyticus RIMD 2210633
451,1,wild type,V. parahaemolyticus RIMD 2210633
320,1,wild type,V. parahaemolyticus RIMD 2210633
298,1,wild type,V. parahaemolyticus RIMD 2210633
316,1,wild type,V. parahaemolyticus RIMD 2210633
284,1,wild type,V. parahaemolyticus RIMD 2210633
523,1,wild type,V. parahaemolyticus RIMD 2210633
479,1,wild type,V. parahaemolyticus RIMD 2210633
332,1,wild type,V. parahaemolyticus RIMD 2210633
324,1,wild type,V. parahaemolyticus RIMD 2210633
333,1,wild type,V. parahaemolyticus RIMD 2210633
283,1,wild type,V. parahaemolyticus RIMD 2210633
257,1,wild type,V. parahaemolyticus RIMD 2210633
551,1,wild type,V. parahaemolyticus RIMD 2210633
407,1,wild type,V. parahaemolyticus RIMD 2210633
435,1,wild type,V. parahaemolyticus RIMD 2210633
258,1,wild type,V. parahaemolyticus RIMD 2210633
255,1,wild type,V. parahaemolyticus RIMD 2210633
358,1,wild type,V. parahaemolyticus RIMD 2210633
370,1,wild type,V. parahaemolyticus RIMD 2210633
252,1,wild type,V. parahaemolyticus RIMD 2210633
350,1,wild type,V. parahaemolyticus RIMD 2210633
239,1,wild type,V. parahaemolyticus RIMD 2210633
424,1,wild type,V. parahaemolyticus RIMD 2210633
388,1,wild type,V. parahaemolyticus RIMD 2210633
274,1,wild type,V. parahaemolyticus RIMD 2210633
757,1,wild type,V. parahaemolyticus RIMD 2210633
318,1,wild type,V. parahaemolyticus RIMD 2210633
337,1,wild type,V. parahaemolyticus RIMD 2210633
393,1,wild type,V. parahaemolyticus RIMD 2210633
387,1,wild type,V. parahaemolyticus RIMD 2210633
515,1,wild type,V. parahaemolyticus RIMD 2210633
336,1,wild type,V. parahaemolyticus RIMD 2210633
276,1,wild type,V. parahaemolyticus RIMD 2210633
498,1,wild type,V. parahaemolyticus RIMD 2210633
361,1,wild type,V. parahaemolyticus RIMD 2210633
345,1,wild type,V. parahaemolyticus RIMD 2210633
336,1,wild type,V. parahaemolyticus RIMD 2210633
290,1,wild type,V. parahaemolyticus RIMD 2210633
319,1,wild type,V. parahaemolyticus RIMD 2210633
564,1,wild type,V. parahaemolyticus RIMD 2210633
445,1,wild type,V. parahaemolyticus RIMD 2210633
272,1,wild type,V. parahaemolyticus RIMD 2210633
338,1,wild type,V. parahaemolyticus RIMD 2210633
290,1,wild type,V. parahaemolyticus RIMD 2210633
277,1,wild type,V. parahaemolyticus RIMD 2210633
265,1,wild type,V. parahaemolyticus RIMD 2210633
499,1,wild type,V. parahaemolyticus RIMD 2210633
398,1,wild type,V. parahaemolyticus RIMD 2210633
393,1,wild type,V. parahaemolyticus RIMD 2210633
230,1,wild type,V. parahaemolyticus RIMD 2210633
349,1,wild type,V. parahaemolyticus RIMD 2210633
262,1,wild type,V. parahaemolyticus RIMD 2210633
341,1,wild type,V. parahaemolyticus RIMD 2210633
333,1,wild type,V. parahaemolyticus RIMD 2210633
282,1,wild type,V. parahaemolyticus RIMD 2210633
309,1,wild type,V. parahaemolyticus RIMD 2210633
258,1,wild type,V. parahaemolyticus RIMD 2210633
407,1,wild type,V. parahaemolyticus RIMD 2210633
239,1,wild type,V. parahaemolyticus RIMD 2210633
318,1,wild type,V. parahaemolyticus RIMD 2210633
380,1,wild type,V. parahaemolyticus RIMD 2210633
246,1,wild type,V. parahaemolyticus RIMD 2210633
236,1,wild type,V. parahaemolyticus RIMD 2210633
319,1,wild type,V. parahaemolyticus RIMD 2210633
344,1,wild type,V. parahaemolyticus RIMD 2210633
232,1,wild type,V. parahaemolyticus RIMD 2210633
400,1,wild type,V. parahaemolyticus RIMD 2210633
616,1,wild type,V. parahaemolyticus RIMD 2210633
259,1,wild type,V. parahaemolyticus RIMD 2210633
541,1,wild type,V. parahaemolyticus RIMD 2210633
253,1,wild type,V. parahaemolyticus RIMD 2210633
272,1,wild type,V. parahaemolyticus RIMD 2210633
324,1,wild type,V. parahaemolyticus RIMD 2210633
291,1,wild type,V. parahaemolyticus RIMD 2210633
327,1,wild type,V. parahaemolyticus RIMD 2210633
306,1,wild type,V. parahaemolyticus RIMD 2210633
340,1,wild type,V. parahaemolyticus RIMD 2210633
411,1,wild type,V. parahaemolyticus RIMD 2210633
416,1,wild type,V. parahaemolyticus RIMD 2210633
351,1,wild type,V. parahaemolyticus RIMD 2210633
667,1,wild type,V. parahaemolyticus RIMD 2210633
324,1,wild type,V. parahaemolyticus RIMD 2210633
312,1,wild type,V. parahaemolyticus RIMD 2210633
252,1,wild type,V. parahaemolyticus RIMD 2210633
247,1,wild type,V. parahaemolyticus RIMD 2210633
342,1,wild type,V. parahaemolyticus RIMD 2210633
303,1,wild type,V. parahaemolyticus RIMD 2210633
264,1,wild type,V. parahaemolyticus RIMD 2210633
382,1,wild type,V. parahaemolyticus RIMD 2210633
418,1,wild type,V. parahaemolyticus RIMD 2210633
404,1,wild type,V. parahaemolyticus RIMD 2210633
238,1,wild type,V. parahaemolyticus RIMD 2210633
316,1,wild type,V. parahaemolyticus RIMD 2210633
393,1,wild type,V. parahaemolyticus RIMD 2210633
334,1,wild type,V. parahaemolyticus RIMD 2210633
311,1,wild type,V. parahaemolyticus RIMD 2210633
451,1,wild type,V. parahaemolyticus RIMD 2210633
439,1,wild type,V. parahaemolyticus RIMD 2210633
277,1,wild type,V. parahaemolyticus RIMD 2210633
595,1,wild type,V. parahaemolyticus RIMD 2210633
552,1,wild type,V. parahaemolyticus RIMD 2210633
374,1,wild type,V. parahaemolyticus RIMD 2210633
895,1,wild type,V. parahaemolyticus RIMD 2210633
339,1,wild type,V. parahaemolyticus RIMD 2210633
246,1,wild type,V. parahaemolyticus RIMD 2210633
244,1,wild type,V. parahaemolyticus RIMD 2210633
232,1,wild type,V. parahaemolyticus RIMD 2210633
249,1,wild type,V. parahaemolyticus RIMD 2210633
592,1,wild type,V. parahaemolyticus RIMD 2210633
461,1,wild type,V. parahaemolyticus RIMD 2210633
271,1,wild type,V. parahaemolyticus RIMD 2210633
536,1,wild type,V. parahaemolyticus RIMD 2210633
267,1,wild type,V. parahaemolyticus RIMD 2210633
531,1,wild type,V. parahaemolyticus RIMD 2210633
724,1,wild type,V. parahaemolyticus RIMD 2210633
242,1,wild type,V. parahaemolyticus RIMD 2210633
461,1,wild type,V. parahaemolyticus RIMD 2210633
374,1,wild type,V. parahaemolyticus RIMD 2210633
254,1,wild type,V. parahaemolyticus RIMD 2210633
527,1,wild type,V. parahaemolyticus RIMD 2210633
252,1,wild type,V. parahaemolyticus RIMD 2210633
244,1,wild type,V. parahaemolyticus RIMD 2210633
233,1,wild type,V. parahaemolyticus RIMD 2210633
234,1,wild type,V. parahaemolyticus RIMD 2210633
274,1,wild type,V. parahaemolyticus RIMD 2210633
241,1,wild type,V. parahaemolyticus RIMD 2210633
349,1,wild type,V. parahaemolyticus RIMD 2210633
272,1,wild type,V. parahaemolyticus RIMD 2210633
505,1,wild type,V. parahaemolyticus RIMD 2210633
310,1,wild type,V. parahaemolyticus RIMD 2210633
260,1,wild type,V. parahaemolyticus RIMD 2210633
254,1,wild type,V. parahaemolyticus RIMD 2210633
277,1,wild type,V. parahaemolyticus RIMD 2210633
250,1,wild type,V. parahaemolyticus RIMD 2210633
357,1,wild type,V. parahaemolyticus RIMD 2210633
530,1,wild type,V. parahaemolyticus RIMD 2210633
320,1,wild type,V. parahaemolyticus RIMD 2210633
256,1,wild type,V. parahaemolyticus RIMD 2210633
234,1,wild type,V. parahaemolyticus RIMD 2210633
272,1,wild type,V. parahaemolyticus RIMD 2210633
326,1,wild type,V. parahaemolyticus RIMD 2210633
382,1,wild type,V. parahaemolyticus RIMD 2210633
394,1,wild type,V. parahaemolyticus RIMD 2210633
257,1,wild type,V. parahaemolyticus RIMD 2210633
384,1,wild type,V. parahaemolyticus RIMD 2210633
357,1,wild type,V. parahaemolyticus RIMD 2210633
388,1,wild type,V. parahaemolyticus RIMD 2210633
298,1,wild type,V. parahaemolyticus RIMD 2210633
336,1,wild type,V. parahaemolyticus RIMD 2210633
408,1,wild type,V. parahaemolyticus RIMD 2210633
275,2,wild type,V. parahaemolyticus RIMD 2210633
246,2,wild type,V. parahaemolyticus RIMD 2210633
334,2,wild type,V. parahaemolyticus RIMD 2210633
430,2,wild type,V. parahaemolyticus RIMD 2210633
395,2,wild type,V. parahaemolyticus RIMD 2210633
276,2,wild type,V. parahaemolyticus RIMD 2210633
391,2,wild type,V. parahaemolyticus RIMD 2210633
332,2,wild type,V. parahaemolyticus RIMD 2210633
286,2,wild type,V. parahaemolyticus RIMD 2210633
597,2,wild type,V. parahaemolyticus RIMD 2210633
381,2,wild type,V. parahaemolyticus RIMD 2210633
325,2,wild type,V. parahaemolyticus RIMD 2210633
454,2,wild type,V. parahaemolyticus RIMD 2210633
369,2,wild type,V. parahaemolyticus RIMD 2210633
325,2,wild type,V. parahaemolyticus RIMD 2210633
370,2,wild type,V. parahaemolyticus RIMD 2210633
363,2,wild type,V. parahaemolyticus RIMD 2210633
426,2,wild type,V. parahaemolyticus RIMD 2210633
313,2,wild type,V. parahaemolyticus RIMD 2210633
278,2,wild type,V. parahaemolyticus RIMD 2210633
328,2,wild type,V. parahaemolyticus RIMD 2210633
346,2,wild type,V. parahaemolyticus RIMD 2210633
318,2,wild type,V. parahaemolyticus RIMD 2210633
618,2,wild type,V. parahaemolyticus RIMD 2210633
273,2,wild type,V. parahaemolyticus RIMD 2210633
346,2,wild type,V. parahaemolyticus RIMD 2210633
491,2,wild type,V. parahaemolyticus RIMD 2210633
394,2,wild type,V. parahaemolyticus RIMD 2210633
270,2,wild type,V. parahaemolyticus RIMD 2210633
572,2,wild type,V. parahaemolyticus RIMD 2210633
441,2,wild type,V. parahaemolyticus RIMD 2210633
422,2,wild type,V. parahaemolyticus RIMD 2210633
321,2,wild type,V. parahaemolyticus RIMD 2210633
303,2,wild type,V. parahaemolyticus RIMD 2210633
491,2,wild type,V. parahaemolyticus RIMD 2210633
346,2,wild type,V. parahaemolyticus RIMD 2210633
286,2,wild type,V. parahaemolyticus RIMD 2210633
573,2,wild type,V. parahaemolyticus RIMD 2210633
296,2,wild type,V. parahaemolyticus RIMD 2210633
303,2,wild type,V. parahaemolyticus RIMD 2210633
243,2,wild type,V. parahaemolyticus RIMD 2210633
382,2,wild type,V. parahaemolyticus RIMD 2210633
298,2,wild type,V. parahaemolyticus RIMD 2210633
458,2,wild type,V. parahaemolyticus RIMD 2210633
335,2,wild type,V. parahaemolyticus RIMD 2210633
329,2,wild type,V. parahaemolyticus RIMD 2210633
399,2,wild type,V. parahaemolyticus RIMD 2210633
394,2,wild type,V. parahaemolyticus RIMD 2210633
368,2,wild type,V. parahaemolyticus RIMD 2210633
305,2,wild type,V. parahaemolyticus RIMD 2210633
309,2,wild type,V. parahaemolyticus RIMD 2210633
279,2,wild type,V. parahaemolyticus RIMD 2210633
595,2,wild type,V. parahaemolyticus RIMD 2210633
369,2,wild type,V. parahaemolyticus RIMD 2210633
310,2,wild type,V. parahaemolyticus RIMD 2210633
348,2,wild type,V. parahaemolyticus RIMD 2210633
286,2,wild type,V. parahaemolyticus RIMD 2210633
358,2,wild type,V. parahaemolyticus RIMD 2210633
273,2,wild type,V. parahaemolyticus RIMD 2210633
334,2,wild type,V. parahaemolyticus RIMD 2210633
537,2,wild type,V. parahaemolyticus RIMD 2210633
279,2,wild type,V. parahaemolyticus RIMD 2210633
376,2,wild type,V. parahaemolyticus RIMD 2210633
345,2,wild type,V. parahaemolyticus RIMD 2210633
462,2,wild type,V. parahaemolyticus RIMD 2210633
263,2,wild type,V. parahaemolyticus RIMD 2210633
286,2,wild type,V. parahaemolyticus RIMD 2210633
480,2,wild type,V. parahaemolyticus RIMD 2210633
307,2,wild type,V. parahaemolyticus RIMD 2210633
299,2,wild type,V. parahaemolyticus RIMD 2210633
384,2,wild type,V. parahaemolyticus RIMD 2210633
338,2,wild type,V. parahaemolyticus RIMD 2210633
435,2,wild type,V. parahaemolyticus RIMD 2210633
324,2,wild type,V. parahaemolyticus RIMD 2210633
366,2,wild type,V. parahaemolyticus RIMD 2210633
281,2,wild type,V. parahaemolyticus RIMD 2210633
331,2,wild type,V. parahaemolyticus RIMD 2210633
628,2,wild type,V. parahaemolyticus RIMD 2210633
458,2,wild type,V. parahaemolyticus RIMD 2210633
345,2,wild type,V. parahaemolyticus RIMD 2210633
285,2,wild type,V. parahaemolyticus RIMD 2210633
266,2,wild type,V. parahaemolyticus RIMD 2210633
290,2,wild type,V. parahaemolyticus RIMD 2210633
370,2,wild type,V. parahaemolyticus RIMD 2210633
290,2,wild type,V. parahaemolyticus RIMD 2210633
284,2,wild type,V. parahaemolyticus RIMD 2210633
277,2,wild type,V. parahaemolyticus RIMD 2210633
310,2,wild type,V. parahaemolyticus RIMD 2210633
386,2,wild type,V. parahaemolyticus RIMD 2210633
367,2,wild type,V. parahaemolyticus RIMD 2210633
297,2,wild type,V. parahaemolyticus RIMD 2210633
342,2,wild type,V. parahaemolyticus RIMD 2210633
362,2,wild type,V. parahaemolyticus RIMD 2210633
266,2,wild type,V. parahaemolyticus RIMD 2210633
251,2,wild type,V. parahaemolyticus RIMD 2210633
367,2,wild type,V. parahaemolyticus RIMD 2210633
527,2,wild type,V. parahaemolyticus RIMD 2210633
298,2,wild type,V. parahaemolyticus RIMD 2210633
515,2,wild type,V. parahaemolyticus RIMD 2210633
253,2,wild type,V. parahaemolyticus RIMD 2210633
301,2,wild type,V. parahaemolyticus RIMD 2210633
269,2,wild type,V. parahaemolyticus RIMD 2210633
245,2,wild type,V. parahaemolyticus RIMD 2210633
329,2,wild type,V. parahaemolyticus RIMD 2210633
519,2,wild type,V. parahaemolyticus RIMD 2210633
283,2,wild type,V. parahaemolyticus RIMD 2210633
587,2,wild type,V. parahaemolyticus RIMD 2210633
322,2,wild type,V. parahaemolyticus RIMD 2210633
404,2,wild type,V. parahaemolyticus RIMD 2210633
332,2,wild type,V. parahaemolyticus RIMD 2210633
308,2,wild type,V. parahaemolyticus RIMD 2210633
393,2,wild type,V. parahaemolyticus RIMD 2210633
470,2,wild type,V. parahaemolyticus RIMD 2210633
343,2,wild type,V. parahaemolyticus RIMD 2210633
390,2,wild type,V. parahaemolyticus RIMD 2210633
349,2,wild type,V. parahaemolyticus RIMD 2210633
310,2,wild type,V. parahaemolyticus RIMD 2210633
300,2,wild type,V. parahaemolyticus RIMD 2210633
462,2,wild type,V. parahaemolyticus RIMD 2210633
542,2,wild type,V. parahaemolyticus RIMD 2210633
455,2,wild type,V. parahaemolyticus RIMD 2210633
807,2,wild type,V. parahaemolyticus RIMD 2210633
358,2,wild type,V. parahaemolyticus RIMD 2210633
332,2,wild type,V. parahaemolyticus RIMD 2210633
524,2,wild type,V. parahaemolyticus RIMD 2210633
558,2,wild type,V. parahaemolyticus RIMD 2210633
248,2,wild type,V. parahaemolyticus RIMD 2210633
347,2,wild type,V. parahaemolyticus RIMD 2210633
291,2,wild type,V. parahaemolyticus RIMD 2210633
303,2,wild type,V. parahaemolyticus RIMD 2210633
397,2,wild type,V. parahaemolyticus RIMD 2210633
435,2,wild type,V. parahaemolyticus RIMD 2210633
342,2,wild type,V. parahaemolyticus RIMD 2210633
309,2,wild type,V. parahaemolyticus RIMD 2210633
380,2,wild type,V. parahaemolyticus RIMD 2210633
579,2,wild type,V. parahaemolyticus RIMD 2210633
572,2,wild type,V. parahaemolyticus RIMD 2210633
253,2,wild type,V. parahaemolyticus RIMD 2210633
352,2,wild type,V. parahaemolyticus RIMD 2210633
315,2,wild type,V. parahaemolyticus RIMD 2210633
846,2,wild type,V. parahaemolyticus RIMD 2210633
371,2,wild type,V. parahaemolyticus RIMD 2210633
329,2,wild type,V. parahaemolyticus RIMD 2210633
413,2,wild type,V. parahaemolyticus RIMD 2210633
538,2,wild type,V. parahaemolyticus RIMD 2210633
374,2,wild type,V. parahaemolyticus RIMD 2210633
420,2,wild type,V. parahaemolyticus RIMD 2210633
382,2,wild type,V. parahaemolyticus RIMD 2210633
250,2,wild type,V. parahaemolyticus RIMD 2210633
587,2,wild type,V. parahaemolyticus RIMD 2210633
457,2,wild type,V. parahaemolyticus RIMD 2210633
452,2,wild type,V. parahaemolyticus RIMD 2210633
380,2,wild type,V. parahaemolyticus RIMD 2210633
476,2,wild type,V. parahaemolyticus RIMD 2210633
512,2,wild type,V. parahaemolyticus RIMD 2210633
432,2,wild type,V. parahaemolyticus RIMD 2210633
601,2,wild type,V. parahaemolyticus RIMD 2210633
291,2,wild type,V. parahaemolyticus RIMD 2210633
318,2,wild type,V. parahaemolyticus RIMD 2210633
298,2,wild type,V. parahaemolyticus RIMD 2210633
373,2,wild type,V. parahaemolyticus RIMD 2210633
323,2,wild type,V. parahaemolyticus RIMD 2210633
269,2,wild type,V. parahaemolyticus RIMD 2210633
539,2,wild type,V. parahaemolyticus RIMD 2210633
489,2,wild type,V. parahaemolyticus RIMD 2210633
420,2,wild type,V. parahaemolyticus RIMD 2210633
367,2,wild type,V. parahaemolyticus RIMD 2210633
295,2,wild type,V. parahaemolyticus RIMD 2210633
406,2,wild type,V. parahaemolyticus RIMD 2210633
310,2,wild type,V. parahaemolyticus RIMD 2210633
495,2,wild type,V. parahaemolyticus RIMD 2210633
397,2,wild type,V. parahaemolyticus RIMD 2210633
400,2,wild type,V. parahaemolyticus RIMD 2210633
462,2,wild type,V. parahaemolyticus RIMD 2210633
414,2,wild type,V. parahaemolyticus RIMD 2210633
350,2,wild type,V. parahaemolyticus RIMD 2210633
384,2,wild type,V. parahaemolyticus RIMD 2210633
332,2,wild type,V. parahaemolyticus RIMD 2210633
541,2,wild type,V. parahaemolyticus RIMD 2210633
305,2,wild type,V. parahaemolyticus RIMD 2210633
430,2,wild type,V. parahaemolyticus RIMD 2210633
337,2,wild type,V. parahaemolyticus RIMD 2210633
439,2,wild type,V. parahaemolyticus RIMD 2210633
483,2,wild type,V. parahaemolyticus RIMD 2210633
341,2,wild type,V. parahaemolyticus RIMD 2210633
313,2,wild type,V. parahaemolyticus RIMD 2210633
248,2,wild type,V. parahaemolyticus RIMD 2210633
306,3,wild type,V. parahaemolyticus RIMD 2210633
294,3,wild type,V. parahaemolyticus RIMD 2210633
247,3,wild type,V. parahaemolyticus RIMD 2210633
252,3,wild type,V. parahaemolyticus RIMD 2210633
309,3,wild type,V. parahaemolyticus RIMD 2210633
469,3,wild type,V. parahaemolyticus RIMD 2210633
287,3,wild type,V. parahaemolyticus RIMD 2210633
263,3,wild type,V. parahaemolyticus RIMD 2210633
226,3,wild type,V. parahaemolyticus RIMD 2210633
376,3,wild type,V. parahaemolyticus RIMD 2210633
386,3,wild type,V. parahaemolyticus RIMD 2210633
249,3,wild type,V. parahaemolyticus RIMD 2210633
347,3,wild type,V. parahaemolyticus RIMD 2210633
460,3,wild type,V. parahaemolyticus RIMD 2210633
404,3,wild type,V. parahaemolyticus RIMD 2210633
434,3,wild type,V. parahaemolyticus RIMD 2210633
412,3,wild type,V. parahaemolyticus RIMD 2210633
388,3,wild type,V. parahaemolyticus RIMD 2210633
767,3,wild type,V. parahaemolyticus RIMD 2210633
558,3,wild type,V. parahaemolyticus RIMD 2210633
275,3,wild type,V. parahaemolyticus RIMD 2210633
568,3,wild type,V. parahaemolyticus RIMD 2210633
510,3,wild type,V. parahaemolyticus RIMD 2210633
395,3,wild type,V. parahaemolyticus RIMD 2210633
363,3,wild type,V. parahaemolyticus RIMD 2210633
267,3,wild type,V. parahaemolyticus RIMD 2210633
306,3,wild type,V. parahaemolyticus RIMD 2210633
244,3,wild type,V. parahaemolyticus RIMD 2210633
527,3,wild type,V. parahaemolyticus RIMD 2210633
317,3,wild type,V. parahaemolyticus RIMD 2210633
308,3,wild type,V. parahaemolyticus RIMD 2210633
435,3,wild type,V. parahaemolyticus RIMD 2210633
330,3,wild type,V. parahaemolyticus RIMD 2210633
388,3,wild type,V. parahaemolyticus RIMD 2210633
287,3,wild type,V. parahaemolyticus RIMD 2210633
466,3,wild type,V. parahaemolyticus RIMD 2210633
502,3,wild type,V. parahaemolyticus RIMD 2210633
256,3,wild type,V. parahaemolyticus RIMD 2210633
589,3,wild type,V. parahaemolyticus RIMD 2210633
452,3,wild type,V. parahaemolyticus RIMD 2210633
404,3,wild type,V. parahaemolyticus RIMD 2210633
336,3,wild type,V. parahaemolyticus RIMD 2210633
290,3,wild type,V. parahaemolyticus RIMD 2210633
246,3,wild type,V. parahaemolyticus RIMD 2210633
234,3,wild type,V. parahaemolyticus RIMD 2210633
282,3,wild type,V. parahaemolyticus RIMD 2210633
409,3,wild type,V. parahaemolyticus RIMD 2210633
295,3,wild type,V. parahaemolyticus RIMD 2210633
240,3,wild type,V. parahaemolyticus RIMD 2210633
314,3,wild type,V. parahaemolyticus RIMD 2210633
251,3,wild type,V. parahaemolyticus RIMD 2210633
433,3,wild type,V. parahaemolyticus RIMD 2210633
295,3,wild type,V. parahaemolyticus RIMD 2210633
535,3,wild type,V. parahaemolyticus RIMD 2210633
265,3,wild type,V. parahaemolyticus RIMD 2210633
378,3,wild type,V. parahaemolyticus RIMD 2210633
492,3,wild type,V. parahaemolyticus RIMD 2210633
310,3,wild type,V. parahaemolyticus RIMD 2210633
327,3,wild type,V. parahaemolyticus RIMD 2210633
497,3,wild type,V. parahaemolyticus RIMD 2210633
386,3,wild type,V. parahaemolyticus RIMD 2210633
544,3,wild type,V. parahaemolyticus RIMD 2210633
430,3,wild type,V. parahaemolyticus RIMD 2210633
554,3,wild type,V. parahaemolyticus RIMD 2210633
292,3,wild type,V. parahaemolyticus RIMD 2210633
337,3,wild type,V. parahaemolyticus RIMD 2210633
277,3,wild type,V. parahaemolyticus RIMD 2210633
327,3,wild type,V. parahaemolyticus RIMD 2210633
259,3,wild type,V. parahaemolyticus RIMD 2210633
322,3,wild type,V. parahaemolyticus RIMD 2210633
390,3,wild type,V. parahaemolyticus RIMD 2210633
352,3,wild type,V. parahaemolyticus RIMD 2210633
368,3,wild type,V. parahaemolyticus RIMD 2210633
227,3,wild type,V. parahaemolyticus RIMD 2210633
356,3,wild type,V. parahaemolyticus RIMD 2210633
268,3,wild type,V. parahaemolyticus RIMD 2210633
244,3,wild type,V. parahaemolyticus RIMD 2210633
491,3,wild type,V. parahaemolyticus RIMD 2210633
426,3,wild type,V. parahaemolyticus RIMD 2210633
313,3,wild type,V. parahaemolyticus RIMD 2210633
526,3,wild type,V. parahaemolyticus RIMD 2210633
400,3,wild type,V. parahaemolyticus RIMD 2210633
293,3,wild type,V. parahaemolyticus RIMD 2210633
318,3,wild type,V. parahaemolyticus RIMD 2210633
281,3,wild type,V. parahaemolyticus RIMD 2210633
246,3,wild type,V. parahaemolyticus RIMD 2210633
276,3,wild type,V. parahaemolyticus RIMD 2210633
447,3,wild type,V. parahaemolyticus RIMD 2210633
298,3,wild type,V. parahaemolyticus RIMD 2210633
391,3,wild type,V. parahaemolyticus RIMD 2210633
230,3,wild type,V. parahaemolyticus RIMD 2210633
346,3,wild type,V. parahaemolyticus RIMD 2210633
444,3,wild type,V. parahaemolyticus RIMD 2210633
609,3,wild type,V. parahaemolyticus RIMD 2210633
542,3,wild type,V. parahaemolyticus RIMD 2210633
397,3,wild type,V. parahaemolyticus RIMD 2210633
607,3,wild type,V. parahaemolyticus RIMD 2210633
276,3,wild type,V. parahaemolyticus RIMD 2210633
260,3,wild type,V. parahaemolyticus RIMD 2210633
453,3,wild type,V. parahaemolyticus RIMD 2210633
484,3,wild type,V. parahaemolyticus RIMD 2210633
357,3,wild type,V. parahaemolyticus RIMD 2210633
535,3,wild type,V. parahaemolyticus RIMD 2210633
371,3,wild type,V. parahaemolyticus RIMD 2210633
329,3,wild type,V. parahaemolyticus RIMD 2210633
528,3,wild type,V. parahaemolyticus RIMD 2210633
333,3,wild type,V. parahaemolyticus RIMD 2210633
305,3,wild type,V. parahaemolyticus RIMD 2210633
462,3,wild type,V. parahaemolyticus RIMD 2210633
384,3,wild type,V. parahaemolyticus RIMD 2210633
301,3,wild type,V. parahaemolyticus RIMD 2210633
536,3,wild type,V. parahaemolyticus RIMD 2210633
306,3,wild type,V. parahaemolyticus RIMD 2210633
304,3,wild type,V. parahaemolyticus RIMD 2210633
336,3,wild type,V. parahaemolyticus RIMD 2210633
401,3,wild type,V. parahaemolyticus RIMD 2210633
327,3,wild type,V. parahaemolyticus RIMD 2210633
287,3,wild type,V. parahaemolyticus RIMD 2210633
373,3,wild type,V. parahaemolyticus RIMD 2210633
365,3,wild type,V. parahaemolyticus RIMD 2210633
234,3,wild type,V. parahaemolyticus RIMD 2210633
281,3,wild type,V. parahaemolyticus RIMD 2210633
265,3,wild type,V. parahaemolyticus RIMD 2210633
440,3,wild type,V. parahaemolyticus RIMD 2210633
356,3,wild type,V. parahaemolyticus RIMD 2210633
299,3,wild type,V. parahaemolyticus RIMD 2210633
405,3,wild type,V. parahaemolyticus RIMD 2210633
390,3,wild type,V. parahaemolyticus RIMD 2210633
262,3,wild type,V. parahaemolyticus RIMD 2210633
329,3,wild type,V. parahaemolyticus RIMD 2210633
472,3,wild type,V. parahaemolyticus RIMD 2210633
267,3,wild type,V. parahaemolyticus RIMD 2210633
320,3,wild type,V. parahaemolyticus RIMD 2210633
498,3,wild type,V. parahaemolyticus RIMD 2210633
471,3,wild type,V. parahaemolyticus RIMD 2210633
357,3,wild type,V. parahaemolyticus RIMD 2210633
397,3,wild type,V. parahaemolyticus RIMD 2210633
347,3,wild type,V. parahaemolyticus RIMD 2210633
511,3,wild type,V. parahaemolyticus RIMD 2210633
424,3,wild type,V. parahaemolyticus RIMD 2210633
369,3,wild type,V. parahaemolyticus RIMD 2210633
355,3,wild type,V. parahaemolyticus RIMD 2210633
310,3,wild type,V. parahaemolyticus RIMD 2210633
425,3,wild type,V. parahaemolyticus RIMD 2210633
348,3,wild type,V. parahaemolyticus RIMD 2210633
285,3,wild type,V. parahaemolyticus RIMD 2210633
382,3,wild type,V. parahaemolyticus RIMD 2210633
330,3,wild type,V. parahaemolyticus RIMD 2210633
346,3,wild type,V. parahaemolyticus RIMD 2210633
392,3,wild type,V. parahaemolyticus RIMD 2210633
316,3,wild type,V. parahaemolyticus RIMD 2210633
312,3,wild type,V. parahaemolyticus RIMD 2210633
380,3,wild type,V. parahaemolyticus RIMD 2210633
375,3,wild type,V. parahaemolyticus RIMD 2210633
338,3,wild type,V. parahaemolyticus RIMD 2210633
254,3,wild type,V. parahaemolyticus RIMD 2210633
263,3,wild type,V. parahaemolyticus RIMD 2210633
588,3,wild type,V. parahaemolyticus RIMD 2210633
348,3,wild type,V. parahaemolyticus RIMD 2210633
251,3,wild type,V. parahaemolyticus RIMD 2210633
410,3,wild type,V. parahaemolyticus RIMD 2210633
252,3,wild type,V. parahaemolyticus RIMD 2210633
369,3,wild type,V. parahaemolyticus RIMD 2210633
281,3,wild type,V. parahaemolyticus RIMD 2210633
304,3,wild type,V. parahaemolyticus RIMD 2210633
460,3,wild type,V. parahaemolyticus RIMD 2210633
294,3,wild type,V. parahaemolyticus RIMD 2210633
278,3,wild type,V. parahaemolyticus RIMD 2210633
346,3,wild type,V. parahaemolyticus RIMD 2210633
361,3,wild type,V. parahaemolyticus RIMD 2210633
284,3,wild type,V. parahaemolyticus RIMD 2210633
332,3,wild type,V. parahaemolyticus RIMD 2210633
268,3,wild type,V. parahaemolyticus RIMD 2210633
641,3,wild type,V. parahaemolyticus RIMD 2210633
336,3,wild type,V. parahaemolyticus RIMD 2210633
327,3,wild type,V. parahaemolyticus RIMD 2210633
277,3,wild type,V. parahaemolyticus RIMD 2210633
460,3,wild type,V. parahaemolyticus RIMD 2210633
319,3,wild type,V. parahaemolyticus RIMD 2210633
587,3,wild type,V. parahaemolyticus RIMD 2210633
736,3,wild type,V. parahaemolyticus RIMD 2210633
287,3,wild type,V. parahaemolyticus RIMD 2210633
284,3,wild type,V. parahaemolyticus RIMD 2210633
368,3,wild type,V. parahaemolyticus RIMD 2210633
269,3,wild type,V. parahaemolyticus RIMD 2210633
227,3,wild type,V. parahaemolyticus RIMD 2210633
245,3,wild type,V. parahaemolyticus RIMD 2210633
390,3,wild type,V. parahaemolyticus RIMD 2210633
483,3,wild type,V. parahaemolyticus RIMD 2210633
357,3,wild type,V. parahaemolyticus RIMD 2210633
275,3,wild type,V. parahaemolyticus RIMD 2210633
410,3,wild type,V. parahaemolyticus RIMD 2210633
389,3,wild type,V. parahaemolyticus RIMD 2210633
266,3,wild type,V. parahaemolyticus RIMD 2210633
329,3,wild type,V. parahaemolyticus RIMD 2210633
338,3,wild type,V. parahaemolyticus RIMD 2210633
383,3,wild type,V. parahaemolyticus RIMD 2210633
352,3,wild type,V. parahaemolyticus RIMD 2210633
400,3,wild type,V. parahaemolyticus RIMD 2210633
290,3,wild type,V. parahaemolyticus RIMD 2210633
471,3,wild type,V. parahaemolyticus RIMD 2210633
303,3,wild type,V. parahaemolyticus RIMD 2210633
287,3,wild type,V. parahaemolyticus RIMD 2210633
399,1,del hubP,V. parahaemolyticus RIMD 2210633
430,1,del hubP,V. parahaemolyticus RIMD 2210633
365,1,del hubP,V. parahaemolyticus RIMD 2210633
314,1,del hubP,V. parahaemolyticus RIMD 2210633
350,1,del hubP,V. parahaemolyticus RIMD 2210633
353,1,del hubP,V. parahaemolyticus RIMD 2210633
333,1,del hubP,V. parahaemolyticus RIMD 2210633
303,1,del hubP,V. parahaemolyticus RIMD 2210633
501,1,del hubP,V. parahaemolyticus RIMD 2210633
624,1,del hubP,V. parahaemolyticus RIMD 2210633
473,1,del hubP,V. parahaemolyticus RIMD 2210633
620,1,del hubP,V. parahaemolyticus RIMD 2210633
443,1,del hubP,V. parahaemolyticus RIMD 2210633
399,1,del hubP,V. parahaemolyticus RIMD 2210633
290,1,del hubP,V. parahaemolyticus RIMD 2210633
485,1,del hubP,V. parahaemolyticus RIMD 2210633
383,1,del hubP,V. parahaemolyticus RIMD 2210633
330,1,del hubP,V. parahaemolyticus RIMD 2210633
326,1,del hubP,V. parahaemolyticus RIMD 2210633
337,1,del hubP,V. parahaemolyticus RIMD 2210633
311,1,del hubP,V. parahaemolyticus RIMD 2210633
317,1,del hubP,V. parahaemolyticus RIMD 2210633
335,1,del hubP,V. parahaemolyticus RIMD 2210633
315,1,del hubP,V. parahaemolyticus RIMD 2210633
303,1,del hubP,V. parahaemolyticus RIMD 2210633
423,1,del hubP,V. parahaemolyticus RIMD 2210633
314,1,del hubP,V. parahaemolyticus RIMD 2210633
342,1,del hubP,V. parahaemolyticus RIMD 2210633
330,1,del hubP,V. parahaemolyticus RIMD 2210633
281,1,del hubP,V. parahaemolyticus RIMD 2210633
290,1,del hubP,V. parahaemolyticus RIMD 2210633
272,1,del hubP,V. parahaemolyticus RIMD 2210633
440,1,del hubP,V. parahaemolyticus RIMD 2210633
372,1,del hubP,V. parahaemolyticus RIMD 2210633
288,1,del hubP,V. parahaemolyticus RIMD 2210633
352,1,del hubP,V. parahaemolyticus RIMD 2210633
312,1,del hubP,V. parahaemolyticus RIMD 2210633
317,1,del hubP,V. parahaemolyticus RIMD 2210633
326,1,del hubP,V. parahaemolyticus RIMD 2210633
288,1,del hubP,V. parahaemolyticus RIMD 2210633
488,1,del hubP,V. parahaemolyticus RIMD 2210633
384,1,del hubP,V. parahaemolyticus RIMD 2210633
280,1,del hubP,V. parahaemolyticus RIMD 2210633
425,1,del hubP,V. parahaemolyticus RIMD 2210633
459,1,del hubP,V. parahaemolyticus RIMD 2210633
279,1,del hubP,V. parahaemolyticus RIMD 2210633
318,2,del hubP,V. parahaemolyticus RIMD 2210633
395,2,del hubP,V. parahaemolyticus RIMD 2210633
562,2,del hubP,V. parahaemolyticus RIMD 2210633
506,2,del hubP,V. parahaemolyticus RIMD 2210633
376,2,del hubP,V. parahaemolyticus RIMD 2210633
326,2,del hubP,V. parahaemolyticus RIMD 2210633
650,2,del hubP,V. parahaemolyticus RIMD 2210633
464,2,del hubP,V. parahaemolyticus RIMD 2210633
394,2,del hubP,V. parahaemolyticus RIMD 2210633
654,2,del hubP,V. parahaemolyticus RIMD 2210633
381,2,del hubP,V. parahaemolyticus RIMD 2210633
615,2,del hubP,V. parahaemolyticus RIMD 2210633
543,2,del hubP,V. parahaemolyticus RIMD 2210633
513,2,del hubP,V. parahaemolyticus RIMD 2210633
423,2,del hubP,V. parahaemolyticus RIMD 2210633
282,2,del hubP,V. parahaemolyticus RIMD 2210633
397,2,del hubP,V. parahaemolyticus RIMD 2210633
316,2,del hubP,V. parahaemolyticus RIMD 2210633
719,2,del hubP,V. parahaemolyticus RIMD 2210633
364,2,del hubP,V. parahaemolyticus RIMD 2210633
426,2,del hubP,V. parahaemolyticus RIMD 2210633
378,2,del hubP,V. parahaemolyticus RIMD 2210633
402,2,del hubP,V. parahaemolyticus RIMD 2210633
664,2,del hubP,V. parahaemolyticus RIMD 2210633
318,2,del hubP,V. parahaemolyticus RIMD 2210633
301,2,del hubP,V. parahaemolyticus RIMD 2210633
636,2,del hubP,V. parahaemolyticus RIMD 2210633
336,2,del hubP,V. parahaemolyticus RIMD 2210633
340,2,del hubP,V. parahaemolyticus RIMD 2210633
420,2,del hubP,V. parahaemolyticus RIMD 2210633
378,2,del hubP,V. parahaemolyticus RIMD 2210633
466,2,del hubP,V. parahaemolyticus RIMD 2210633
685,2,del hubP,V. parahaemolyticus RIMD 2210633
413,2,del hubP,V. parahaemolyticus RIMD 2210633
445,2,del hubP,V. parahaemolyticus RIMD 2210633
456,2,del hubP,V. parahaemolyticus RIMD 2210633
489,2,del hubP,V. parahaemolyticus RIMD 2210633
463,2,del hubP,V. parahaemolyticus RIMD 2210633
291,2,del hubP,V. parahaemolyticus RIMD 2210633
311,2,del hubP,V. parahaemolyticus RIMD 2210633
406,2,del hubP,V. parahaemolyticus RIMD 2210633
331,2,del hubP,V. parahaemolyticus RIMD 2210633
373,2,del hubP,V. parahaemolyticus RIMD 2210633
299,2,del hubP,V. parahaemolyticus RIMD 2210633
339,2,del hubP,V. parahaemolyticus RIMD 2210633
314,2,del hubP,V. parahaemolyticus RIMD 2210633
475,2,del hubP,V. parahaemolyticus RIMD 2210633
624,2,del hubP,V. parahaemolyticus RIMD 2210633
618,2,del hubP,V. parahaemolyticus RIMD 2210633
467,2,del hubP,V. parahaemolyticus RIMD 2210633
443,2,del hubP,V. parahaemolyticus RIMD 2210633
493,2,del hubP,V. parahaemolyticus RIMD 2210633
482,2,del hubP,V. parahaemolyticus RIMD 2210633
526,2,del hubP,V. parahaemolyticus RIMD 2210633
355,2,del hubP,V. parahaemolyticus RIMD 2210633
323,2,del hubP,V. parahaemolyticus RIMD 2210633
437,2,del hubP,V. parahaemolyticus RIMD 2210633
536,2,del hubP,V. parahaemolyticus RIMD 2210633
597,2,del hubP,V. parahaemolyticus RIMD 2210633
292,2,del hubP,V. parahaemolyticus RIMD 2210633
360,2,del hubP,V. parahaemolyticus RIMD 2210633
938,2,del hubP,V. parahaemolyticus RIMD 2210633
281,2,del hubP,V. parahaemolyticus RIMD 2210633
767,2,del hubP,V. parahaemolyticus RIMD 2210633
712,2,del hubP,V. parahaemolyticus RIMD 2210633
300,2,del hubP,V. parahaemolyticus RIMD 2210633
362,2,del hubP,V. parahaemolyticus RIMD 2210633
692,2,del hubP,V. parahaemolyticus RIMD 2210633
299,2,del hubP,V. parahaemolyticus RIMD 2210633
438,2,del hubP,V. parahaemolyticus RIMD 2210633
363,2,del hubP,V. parahaemolyticus RIMD 2210633
572,2,del hubP,V. parahaemolyticus RIMD 2210633
683,2,del hubP,V. parahaemolyticus RIMD 2210633
552,2,del hubP,V. parahaemolyticus RIMD 2210633
377,2,del hubP,V. parahaemolyticus RIMD 2210633
651,2,del hubP,V. parahaemolyticus RIMD 2210633
499,2,del hubP,V. parahaemolyticus RIMD 2210633
486,2,del hubP,V. parahaemolyticus RIMD 2210633
451,2,del hubP,V. parahaemolyticus RIMD 2210633
600,2,del hubP,V. parahaemolyticus RIMD 2210633
393,2,del hubP,V. parahaemolyticus RIMD 2210633
306,2,del hubP,V. parahaemolyticus RIMD 2210633
358,2,del hubP,V. parahaemolyticus RIMD 2210633
275,2,del hubP,V. parahaemolyticus RIMD 2210633
324,2,del hubP,V. parahaemolyticus RIMD 2210633
405,2,del hubP,V. parahaemolyticus RIMD 2210633
375,2,del hubP,V. parahaemolyticus RIMD 2210633
370,2,del hubP,V. parahaemolyticus RIMD 2210633
296,2,del hubP,V. parahaemolyticus RIMD 2210633
309,2,del hubP,V. parahaemolyticus RIMD 2210633
389,3,del hubP,V. parahaemolyticus RIMD 2210633
298,3,del hubP,V. parahaemolyticus RIMD 2210633
298,3,del hubP,V. parahaemolyticus RIMD 2210633
452,3,del hubP,V. parahaemolyticus RIMD 2210633
316,3,del hubP,V. parahaemolyticus RIMD 2210633
383,3,del hubP,V. parahaemolyticus RIMD 2210633
362,3,del hubP,V. parahaemolyticus RIMD 2210633
483,3,del hubP,V. parahaemolyticus RIMD 2210633
387,3,del hubP,V. parahaemolyticus RIMD 2210633
379,3,del hubP,V. parahaemolyticus RIMD 2210633
424,3,del hubP,V. parahaemolyticus RIMD 2210633
323,3,del hubP,V. parahaemolyticus RIMD 2210633
506,3,del hubP,V. parahaemolyticus RIMD 2210633
312,3,del hubP,V. parahaemolyticus RIMD 2210633
342,3,del hubP,V. parahaemolyticus RIMD 2210633
449,3,del hubP,V. parahaemolyticus RIMD 2210633
452,3,del hubP,V. parahaemolyticus RIMD 2210633
634,3,del hubP,V. parahaemolyticus RIMD 2210633
468,3,del hubP,V. parahaemolyticus RIMD 2210633
397,3,del hubP,V. parahaemolyticus RIMD 2210633
323,3,del hubP,V. parahaemolyticus RIMD 2210633
319,3,del hubP,V. parahaemolyticus RIMD 2210633
301,3,del hubP,V. parahaemolyticus RIMD 2210633
373,3,del hubP,V. parahaemolyticus RIMD 2210633
332,3,del hubP,V. parahaemolyticus RIMD 2210633
323,3,del hubP,V. parahaemolyticus RIMD 2210633
520,3,del hubP,V. parahaemolyticus RIMD 2210633
324,3,del hubP,V. parahaemolyticus RIMD 2210633
652,3,del hubP,V. parahaemolyticus RIMD 2210633
589,3,del hubP,V. parahaemolyticus RIMD 2210633
434,3,del hubP,V. parahaemolyticus RIMD 2210633
367,3,del hubP,V. parahaemolyticus RIMD 2210633
518,3,del hubP,V. parahaemolyticus RIMD 2210633
382,3,del hubP,V. parahaemolyticus RIMD 2210633
366,3,del hubP,V. parahaemolyticus RIMD 2210633
406,3,del hubP,V. parahaemolyticus RIMD 2210633
385,3,del hubP,V. parahaemolyticus RIMD 2210633
315,3,del hubP,V. parahaemolyticus RIMD 2210633
384,3,del hubP,V. parahaemolyticus RIMD 2210633
283,3,del hubP,V. parahaemolyticus RIMD 2210633
376,3,del hubP,V. parahaemolyticus RIMD 2210633
334,3,del hubP,V. parahaemolyticus RIMD 2210633
387,3,del hubP,V. parahaemolyticus RIMD 2210633
502,3,del hubP,V. parahaemolyticus RIMD 2210633
342,3,del hubP,V. parahaemolyticus RIMD 2210633
446,3,del hubP,V. parahaemolyticus RIMD 2210633
361,3,del hubP,V. parahaemolyticus RIMD 2210633
432,3,del hubP,V. parahaemolyticus RIMD 2210633
500,3,del hubP,V. parahaemolyticus RIMD 2210633
289,3,del hubP,V. parahaemolyticus RIMD 2210633
288,3,del hubP,V. parahaemolyticus RIMD 2210633
570,3,del hubP,V. parahaemolyticus RIMD 2210633
414,3,del hubP,V. parahaemolyticus RIMD 2210633
384,3,del hubP,V. parahaemolyticus RIMD 2210633
324,3,del hubP,V. parahaemolyticus RIMD 2210633
326,3,del hubP,V. parahaemolyticus RIMD 2210633
412,3,del hubP,V. parahaemolyticus RIMD 2210633
364,3,del hubP,V. parahaemolyticus RIMD 2210633
347,3,del hubP,V. parahaemolyticus RIMD 2210633
644,3,del hubP,V. parahaemolyticus RIMD 2210633
308,3,del hubP,V. parahaemolyticus RIMD 2210633
311,3,del hubP,V. parahaemolyticus RIMD 2210633
498,3,del hubP,V. parahaemolyticus RIMD 2210633
407,3,del hubP,V. parahaemolyticus RIMD 2210633
331,3,del hubP,V. parahaemolyticus RIMD 2210633
316,3,del hubP,V. parahaemolyticus RIMD 2210633
329,3,del hubP,V. parahaemolyticus RIMD 2210633
403,3,del hubP,V. parahaemolyticus RIMD 2210633
310,3,del hubP,V. parahaemolyticus RIMD 2210633
287,3,del hubP,V. parahaemolyticus RIMD 2210633
309,3,del hubP,V. parahaemolyticus RIMD 2210633
330,3,del hubP,V. parahaemolyticus RIMD 2210633
485,3,del hubP,V. parahaemolyticus RIMD 2210633
513,3,del hubP,V. parahaemolyticus RIMD 2210633
403,3,del hubP,V. parahaemolyticus RIMD 2210633
355,3,del hubP,V. parahaemolyticus RIMD 2210633
360,3,del hubP,V. parahaemolyticus RIMD 2210633
506,3,del hubP,V. parahaemolyticus RIMD 2210633
434,3,del hubP,V. parahaemolyticus RIMD 2210633
569,3,del hubP,V. parahaemolyticus RIMD 2210633
410,3,del hubP,V. parahaemolyticus RIMD 2210633
326,3,del hubP,V. parahaemolyticus RIMD 2210633
672,3,del hubP,V. parahaemolyticus RIMD 2210633
453,3,del hubP,V. parahaemolyticus RIMD 2210633
355,3,del hubP,V. parahaemolyticus RIMD 2210633
358,3,del hubP,V. parahaemolyticus RIMD 2210633
477,3,del hubP,V. parahaemolyticus RIMD 2210633
449,3,del hubP,V. parahaemolyticus RIMD 2210633
315,3,del hubP,V. parahaemolyticus RIMD 2210633
323,3,del hubP,V. parahaemolyticus RIMD 2210633
318,3,del hubP,V. parahaemolyticus RIMD 2210633
501,3,del hubP,V. parahaemolyticus RIMD 2210633
589,3,del hubP,V. parahaemolyticus RIMD 2210633
369,3,del hubP,V. parahaemolyticus RIMD 2210633
394,3,del hubP,V. parahaemolyticus RIMD 2210633
562,3,del hubP,V. parahaemolyticus RIMD 2210633
321,3,del hubP,V. parahaemolyticus RIMD 2210633
328,3,del hubP,V. parahaemolyticus RIMD 2210633
327,3,del hubP,V. parahaemolyticus RIMD 2210633
311,3,del hubP,V. parahaemolyticus RIMD 2210633
323,3,del hubP,V. parahaemolyticus RIMD 2210633
366,3,del hubP,V. parahaemolyticus RIMD 2210633
346,3,del hubP,V. parahaemolyticus RIMD 2210633
632,3,del hubP,V. parahaemolyticus RIMD 2210633
357,3,del hubP,V. parahaemolyticus RIMD 2210633
299,3,del hubP,V. parahaemolyticus RIMD 2210633
314,3,del hubP,V. parahaemolyticus RIMD 2210633
438,3,del hubP,V. parahaemolyticus RIMD 2210633
330,3,del hubP,V. parahaemolyticus RIMD 2210633
336,3,del hubP,V. parahaemolyticus RIMD 2210633
436,3,del hubP,V. parahaemolyticus RIMD 2210633
413,3,del hubP,V. parahaemolyticus RIMD 2210633
324,3,del hubP,V. parahaemolyticus RIMD 2210633
389,3,del hubP,V. parahaemolyticus RIMD 2210633
386,3,del hubP,V. parahaemolyticus RIMD 2210633
312,3,del hubP,V. parahaemolyticus RIMD 2210633
315,3,del hubP,V. parahaemolyticus RIMD 2210633
334,3,del hubP,V. parahaemolyticus RIMD 2210633
387,3,del hubP,V. parahaemolyticus RIMD 2210633
337,3,del hubP,V. parahaemolyticus RIMD 2210633
283,3,del hubP,V. parahaemolyticus RIMD 2210633
570,3,del hubP,V. parahaemolyticus RIMD 2210633
719,3,del hubP,V. parahaemolyticus RIMD 2210633
372,3,del hubP,V. parahaemolyticus RIMD 2210633

## Sheet: Fig. 4 Source Data 1 P.putida
Strain	Genotype	Swimming halo
P. putida KT2440	wild type	100
P. putida KT2440	ΔfipA	58.47
P. putida KT2440	FipA ΔTM-domain	49.1095
P. putida KT2440	wild type	100
P. putida KT2440	ΔfipA	48.54
P. putida KT2440	FipA ΔTM-domain	54.0384
P. putida KT2440	wild type	100
P. putida KT2440	ΔfipA	54.86
P. putida KT2440	FipA ΔTM-domain	54.585

## Sheet: Fig. 4 Source Data V. para
Flagellation pattern of fipA ΔTM
Strain	Genotype	No flagella	Polar flagellation
V. parahaemolyticus RIMD 2210633	wild type	40	60
V. parahaemolyticus RIMD 2210633	wild type	55	45
V. parahaemolyticus RIMD 2210633	wild type	60	40
V. parahaemolyticus RIMD 2210633	fipA ΔTM	60	0
V. parahaemolyticus RIMD 2210633	fipA ΔTM	70	0
V. parahaemolyticus RIMD 2210633	fipA ΔTM	70	0

## Sheet: Fig. 5 Source Data
Swimming assay,,
Strain,Genotype,Swimming halo
P. putida KT2440,WT,100
P. putida KT2440,Î”fipA,50
P. putida KT2440,FipA-G104A,66
P. putida KT2440,FipA-L123A,48
P. putida KT2440,WT,100
P. putida KT2440,Î”fipA,49
P. putida KT2440,FipA-G104A,71
P. putida KT2440,FipA-L123A,47
P. putida KT2440,WT,100
P. putida KT2440,Î”fipA,57
P. putida KT2440,FipA-G104A,74
P. putida KT2440,FipA-L123A,45

## Sheet: Fig. 7 Source Data 1
Swimming assay for FipA variants,,
Strain,Genotype,Swimming halo
S. putrefaciens,WT,100
S. putrefaciens,Î”fipA,87
S. putrefaciens,FipA-G106A,101
S. putrefaciens,FipA-L125A,86
S. putrefaciens,WT,100
S. putrefaciens,Î”fipA,89
S. putrefaciens,FipA-G106A,106
S. putrefaciens,FipA-L125A,89
S. putrefaciens,WT,100
S. putrefaciens,Î”fipA,88
S. putrefaciens,FipA-G106A,101
S. putrefaciens,FipA-L125A,93

[truncated: 1 more sheets: Figure 7 - Source Data 2]
