# Supplementary figures and images for: A conserved cell-pole determinant organizes proper polar flagellum formation
Source: eLife journal article supplement (doi:10.7554/elife.93004), 2024-01-08

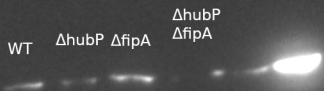

Supplement: fig3-figsupp1-data2 [file elife-93004-fig3-figsupp1-data2-v1.zip]

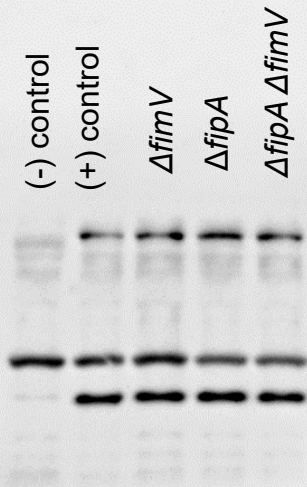

FlhF-mCherry  
~74 kDa

(-) control = *P. putida* wild type

(+) control = FlhF-mCherry

**Date: 16.12.21**

Supplement: fig3-figsupp1-data2 [file elife-93004-fig3-figsupp1-data2-v1.zip]

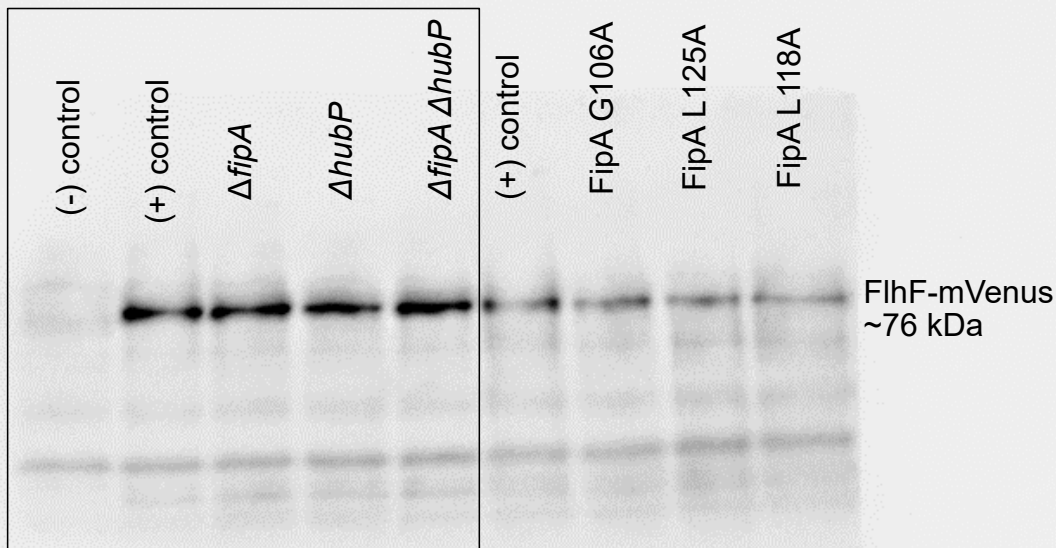

used for Fig.3-Fig Suppl. 1

(-) control = *S. putrefaciens* wild type

(+) control = FlhF-mVenus

**Date: 29.03.22**

Supplement: fig3-figsupp1-data2 [file elife-93004-fig3-figsupp1-data2-v1.zip]

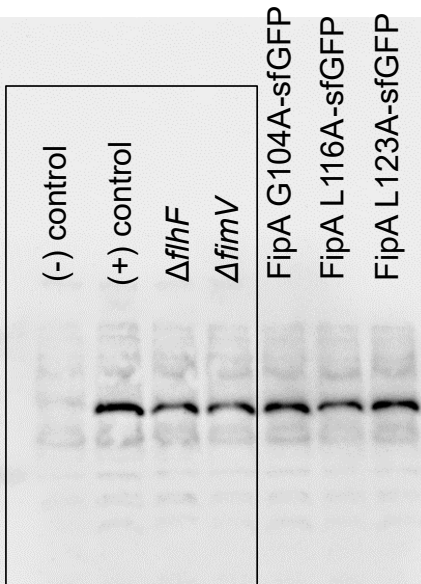

used for Figure 3-figure supplement 1E

(-) control = *P. putida* wild type

(+) control = FipA-sfGFP

**Date: 30.09.21**

Supplement: fig3-figsupp1-data2 [file elife-93004-fig3-figsupp1-data2-v1.zip]

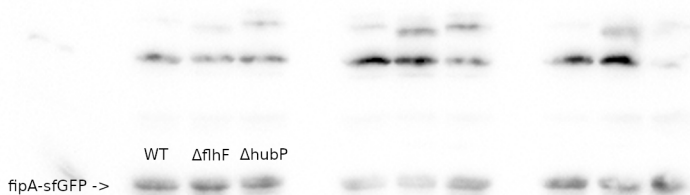

Supplement: fig3-figsupp1-data2 [file elife-93004-fig3-figsupp1-data2-v1.zip]

WT  $\Delta$ fliH fliA fliA  
G110A L129A



Supplement: fig6-figsupp1-data2 [file elife-93004-fig6-figsupp1-data2-v1.zip]

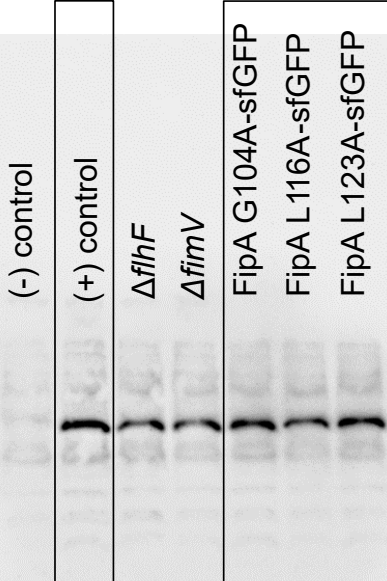

used for Figure 6-figure supplement 1B

(-) control = *P. putida* wild type

(+) control = FipA-sfGFP

**Date: 30.09.21**

Supplement: fig6-figsupp1-data2 [file elife-93004-fig6-figsupp1-data2-v1.zip]

used for Figure 6  
supplement 1C

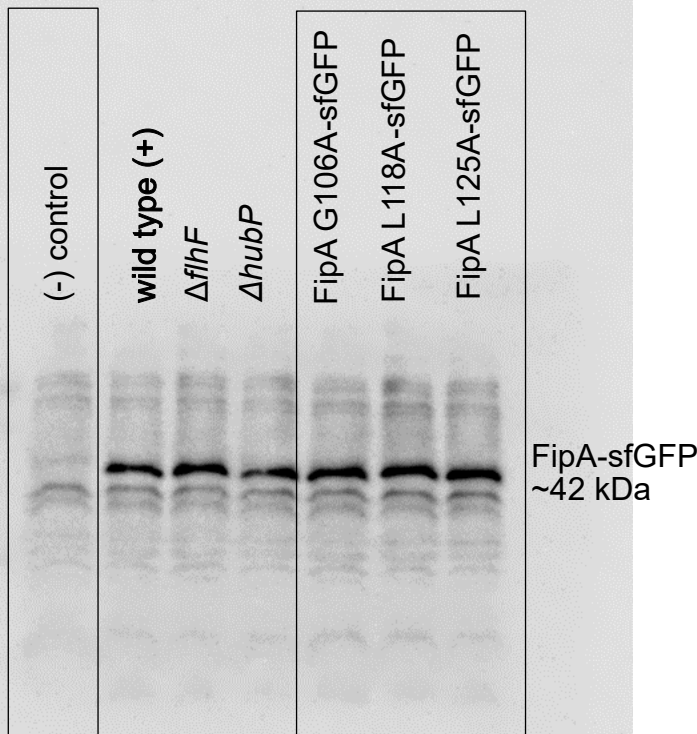

(-) control = *S. putrefaciens* wild type

(+) wild-type background & FipA-sfGFP

Supplement: fig6-figsupp1-data2 [file elife-93004-fig6-figsupp1-data2-v1.zip]
